## SOD1<sup>A4V</sup> aggregation alters ubiquitin homeostasis in a cell model of ALS

1 Natalie E. Farrawell<sup>1,2</sup>, Isabella Lambert-Smith<sup>1,2</sup>, Kristen Mitchell<sup>1,2</sup>, Jessie  
2 McKenna<sup>3</sup>, Luke McAlary<sup>1,2,4</sup>, Prajwal Ciryam<sup>5,6,7</sup>, Kara L. Vine<sup>1,2</sup>, Darren N.  
3 Saunders<sup>3</sup>, Justin J. Yerbury<sup>1,2\*</sup>

4 <sup>1</sup>Illawarra Health and Medical Research Institute, Wollongong, NSW, Australia

5 <sup>2</sup>School of Biological Sciences, Centre of Medicine and Molecular Bioscience,  
6 University of Wollongong, Northfields Ave, Wollongong, NSW, Australia, 2522

7 <sup>3</sup>School of Medical Sciences, Faculty of Medicine, UNSW Australia

8 <sup>4</sup>Department of Physics & Astronomy, University of British Columbia, Vancouver,  
9 British Columbia, Canada.

10 <sup>5</sup>Department of Chemistry, University of Cambridge, Cambridge CB2 1EW, UK

11 <sup>6</sup>Department of Molecular Biosciences, Rice Institute for Biomedical Research,  
12 Northwestern University, Evanston, IL 60208-3500, USA

13 <sup>7</sup>Department of Neurology, Columbia University College of Physicians & Surgeons,  
14 New York, NY 10032-3784

15

16

17

18 \* **Correspondence:**

19 Dr Justin John Yerbury

20 Illawarra Health and Medical Research Institute

21 Northfields Ave, Wollongong, NSW, 2522, Australia.

22 Ph: 61-2-42981534; Email: [jyerbury@uow.edu.au](mailto:jyerbury@uow.edu.au)

23

24 Keywords: protein aggregation, ubiquitin, SOD1, ALS, supersaturation, proteostasis,  
25 neurodegeneration, ubiquitomics, degron, proteasome.

26

27

28 **Abstract**

29 Amyotrophic lateral sclerosis (ALS) is a fatal neurodegenerative disease involving the  
30 selective death of upper and lower motor neurons in the primary motor cortex and  
31 spinal cord. A hallmark of ALS pathology is the accumulation of ubiquitinated  
32 protein inclusions within motor neurons. Previous studies suggest the sequestration of  
33 ubiquitin (Ub) into inclusions reduces the availability of free Ub, which is essential  
34 for cellular function and survival. However, the dynamics of the Ub landscape in ALS  
35 have not yet been described. Here we show that Ub homeostasis is altered in a SOD1  
36 cell model of ALS. Utilising fluorescently tagged Ub, we followed the distribution of  
37 Ub in living cells expressing SOD1 and show that Ub is present at the earliest stages  
38 of SOD1 aggregation. We also report that cells containing aggregates of mutant  
39 SOD1 have greater ubiquitin-proteasome system (UPS) dysfunction as measured by  
40 the accumulation of the fluorescent proteasome reporter tdTomato<sup>CL1</sup>. Furthermore,  
41 SOD1 aggregation is associated with the redistribution of Ub and depletion of the free  
42 Ub pool. Ubiquitomics analysis indicates that mutant SOD1 is associated with a shift  
43 of Ub to a pool of supersaturated proteins including those associated with oxidative  
44 phosphorylation and metabolism, corresponding with altered mitochondrial  
45 morphology and function. Taken together, these results suggest misfolded SOD1  
46 contributes to UPS dysfunction and that Ub homeostasis is an important target for  
47 monitoring pathological changes in ALS.

48

49

## 50 **Background**

51

52 Amyotrophic lateral sclerosis (ALS, also known as motor neuron disease, MND) is a  
53 progressive neurodegenerative disease leading to paralysis of voluntary muscles due  
54 to the death of motor neurons in the brain and spinal cord. The prognosis of ALS is  
55 poor, usually leading to death within 2 to 5 years of first symptoms. A fraction of  
56 patients also develop clinical or subclinical frontotemporal dementia (FTD) [1]. In  
57 most cases of ALS, the cause remains unknown (sporadic ALS; sALS). However,  
58 approximately 10% of cases are inherited (familial ALS; fALS). A large proportion  
59 (20%) of fALS cases can be attributed to mutations in the gene encoding superoxide  
60 dismutase 1 (SOD1) [2]. SOD1 was the first gene discovered to cause fALS and is  
61 also the most widely studied. There are now over 20 genes known to cause ALS [2]  
62 including a growing list of genes associated with dysregulation of ubiquitin (Ub)  
63 signalling. Genetic mutations in VCP, SQSTM1, UBQLN2, OPTN have all been  
64 associated with ALS, and are all part of the cell's protein degradation machinery. In  
65 addition, recently discovered mutations in TBK1 [3] and CCNF [4] add to this  
66 growing list of degradation machinery associated with ALS. The precise role of each  
67 of these genes in the homeostasis of Ub is unknown, but Ub sequestration into  
68 insoluble inclusions is common to all forms of ALS [5].

69

70 Abnormal accumulation of proteins into insoluble aggregates is a hallmark of many  
71 neurodegenerative diseases, including Alzheimer's disease, Parkinson's disease  
72 Huntington's disease and ALS [6]. In the context of ALS, there is growing evidence  
73 that a correlation exists between protein aggregate load and neuronal loss in ALS  
74 spinal cord [7-11]. Our previous work showed a correlation between *in vitro*

75 aggregation propensity and rate of disease progression [12], suggesting that protein  
76 aggregates are intimately linked with motor neuron cell death. Recent work also  
77 indicates that protein misfolding and aggregation may be responsible for disease  
78 progression through a prion like propagation throughout the nervous system [11, 13-  
79 16]. It is unlikely that misfolding alone is responsible for the disease and that post  
80 translational modifications play an important role [17]. One crucial post translational  
81 modification is ubiquitination, necessary for protein degradation. Degradation defects  
82 that lead to inclusion formation are associated with a tendency for cells to be  
83 dysfunctional and undergo apoptosis [18-20].

84

85 Inclusions associated with neurodegeneration consist of a variety of proteins including  
86 proteins specific to the disease (e.g. A $\beta$  and tau in Alzheimer's disease [21]), proteins  
87 associated with cellular quality control machinery (e.g. molecular chaperones [22, 23]  
88 and the proteasome [24]) and other unrelated aggregation prone proteins [25, 26].  
89 Based on analysis of human tissue, it has been shown that a large number of proteins  
90 are supersaturated in the cell, with cellular concentrations under wild-type conditions  
91 that exceed their predicted solubility [25, 26]. These supersaturated proteins are  
92 associated with the biochemical pathways underpinning a variety of  
93 neurodegenerative diseases. Most recently, we have shown that proteins co-  
94 aggregating with SOD1, TDP-43, and FUS inclusions are supersaturated [5],  
95 consistent with a collapse of motor neuron protein homeostasis in ALS. Others have  
96 found that the proteins that co-aggregate with c9orf72 dipeptide repeats in cell models  
97 are also supersaturated [27]. The composition of inclusions found in ALS varies  
98 considerably depending on whether the disease is sporadic or familial, and the  
99 genetics of the familial forms.

100

101 Ub is a pervasive feature of inclusions in ALS, regardless of underlying genetic  
102 aetiology. Ub is a versatile signalling molecule responsible for controlling an array of  
103 cellular pathways including transcription, translation, vehicle transport and apoptosis  
104 [28]. Ub labels substrate proteins via a highly ordered multi-step enzymatic cascade  
105 with specific differences in the length and topology of poly-ubiquitin chains  
106 determining a range of signalling outcomes, including proteolytic degradation via the  
107 proteasome [29, 30]. Inside cells, Ub exists in a dynamic equilibrium between free Ub  
108 and Ub conjugates and is controlled by the opposing actions of Ub ligases and  
109 deubiquitinating enzymes (DUBS) [31, 32]. It has been proposed that the  
110 sequestration of Ub into insoluble aggregates may deplete the free Ub pool required  
111 by many essential cellular processes [32].

112

113 Although mounting genetic and functional evidence suggests an important role for the  
114 UPS in the development of ALS pathology, the distribution and availability of Ub in  
115 ALS models has not yet been described. In the work reported here, we sought to  
116 characterise the Ub landscape in a cell-based SOD1 model of ALS (**Figure 1**). We  
117 show that Ub homeostasis is disrupted in cells containing SOD1 aggregates by  
118 following the distribution of fluorescently labelled Ub in live cells expressing SOD1.  
119 The aggregation of mutant SOD1 leads to an accumulation of the proteasome reporter  
120 tdTomato<sup>CL1</sup>, indicative of UPS dysfunction. This dysfunction was further supported  
121 by the redistribution of the Ub pool and decrease in free Ub levels observed in cells  
122 with SOD1 aggregates. Moreover, ubiquitome analysis confirmed misfolded SOD1  
123 was associated with Ub redistribution and subsequent alterations to mitochondrial  
124 morphology. This report highlights that disruption to Ub homeostasis is associated

125 with aggregation of misfolded proteins and may play an important role in the

126 pathogenesis of ALS.

127

128

129 **Methods**

130 **Plasmids.** pEGFP-N1 vectors containing human SOD1<sup>WT</sup> and SOD1<sup>A4V</sup> were  
131 generated as described [33]. GFP-Ub and mRFP-Ub (Addgene plasmids 11928 and  
132 11935, provided by Nico Dantuma [31, 34]) were acquired from Addgene (USA). The  
133 mcherry-Ub construct was created by replacing the mRFP sequence in mRFP-Ub with  
134 mcherry fluorescent protein. The tdTomato<sup>CL1</sup> construct was obtained by cloning the  
135 CL1 sequence (ACKNWFSSLSHFVIHL) into pcDNA3.1(+)

136

137 **Cell Culture and Transfection.** Neuroblastoma × Spinal cord hybrid NSC-34 cells  
138 [35] were maintained in Dulbecco's Modified Eagles Medium/ Ham's Nutrient  
139 Mixture F12 (DMEM/F12) supplemented with 10% foetal bovine serum (FBS,  
140 Bovogen Biologicals, Australia). Cells were maintained at 37 °C in a humidified  
141 incubator with 5% atmospheric CO<sub>2</sub>. For confocal microscopy, cells were grown on  
142 13 mm round coverslips in 24-well plates or on 8-well μ-slides (Ibidi, Germany).  
143 Cells were grown in 6-well plates for cell lysate and cell sorting experiments. Cells  
144 were transfected using Lipofectamine 3000 (Invitrogen, USA) according to  
145 manufacturer's instructions with 0.5 μg DNA per well for a 24-well plate, 0.2 μg  
146 DNA per well for 8-well μ-slides and 2.5 μg DNA per well for 6-well plates. For co-  
147 transfections the amount of DNA was divided equally between constructs.

148

149 **Measurement of UPS function.** To quantify UPS activity, NSC-34 cells were co-  
150 transfected with the fluorescent proteasome reporter tdTomato<sup>CL1</sup> and treated  
151 overnight (~18 h) with 0-30μM of the proteasome inhibitor MG132. The level of  
152 tdTomato<sup>CL1</sup> fluorescence was determined using flow cytometry on a Becton  
153 Dickinson flow cytometer 48 h post transfection as in [36].

154

155 **Live cell imaging.** Imaging of NSC-34 cells co-transfected with SOD1<sup>A4V</sup>-GFP and  
156 mRFP-Ub was performed 24 h post transfection on a Leica TCS SP5 confocal  
157 microscope. Cells were imaged every 15 min over 17 h in a CO<sub>2</sub> chamber maintained  
158 at 37°C with 5% CO<sub>2</sub>. For fluorescence recovery after photobleaching (FRAP) and  
159 fluorescence recovery after nucleus photobleaching (FRANP) experiments, analysis  
160 was performed on transfected NSC-34 cells 48 h post transfection using the LAS AF  
161 FRAP Application Wizard on the Leica TCS SP5 confocal Microscope. Images were  
162 acquired using the 63× objective with two line averages and a scan speed of 700 Hz.  
163 Five pre-bleach images were acquired over 7.5 s with the 561 nm laser set at 20%  
164 power. The region of interest (ROI) was then bleached using the ‘zoom in ROI’  
165 method over five frames of 1.5 s at 100% laser power. For FRANP analysis, the entire  
166 nucleus was bleached. Fluorescence recovery or loss was monitored for 120 s with the  
167 laser power set back at 20%.

168

169 **Frequency distribution analysis.** GFP fluorescence in NSC-34 cells expressing  
170 soluble and insoluble (aggregated) SOD1<sup>A4V</sup>-GFP was quantified from confocal  
171 images taken 48 h post transfection using ImageJ 1.48v [37]. Frequency distribution  
172 analysis was subsequently performed in GraphPad Prism version 5.00 for Windows  
173 (GraphPad software, USA).

174

175 **Immunofluorescence.** NSC-34 cells grown on coverslips were transfected with GFP-  
176 tagged mutant SOD1 and fixed for 20 min at room temperature (RT) with 4%  
177 paraformaldehyde (PFA) (Merck Millipore, USA) in phosphate buffered saline (PBS)  
178 48 h post transfection. Cells were permeabilized in 1% tritonX-100 (TX-100) in PBS



179 for 30 min on ice before blocking for 1 h at RT with 5% FBS, 1% Bovine serum  
180 albumin (BSA) 0.3% TX-100 in PBS. Cells were incubated with rabbit primary  
181 antibodies against K48 or K63 Ub chain linkages (05-1307/05-1308, Merck  
182 Millipore) overnight at 4 °C followed by Alexa Fluor 647-conjugated anti-rabbit IgG  
183 secondary antibody for 5 h at RT. All antibodies were diluted in 1% BSA, 0.1% TX-  
184 100 in PBS and cells were washed with PBS between each incubation step.

185

186 Spinal cord sections from the SOD1<sup>G93A</sup> mouse were also stained for SOD1 and K48  
187 or K63 Ub chain linkages. A pap pen (Daido Sangyo, Tokyo, Japan) was used to  
188 separate tissue sections mounted onto the same slide. Sections were then fixed with  
189 4% PFA for 15 min at RT before permeabilization at RT for 10 min with 0.1% TX-  
190 100 in PBS containing 2% (v/v) normal horse serum (NHS). Sections were then  
191 blocked for 20 min at RT with 20% NHS and 2% BSA in PBS followed by staining  
192 overnight at 4 °C in a humidified chamber with sheep anti-superoxide dismutase-1  
193 (ab8866, Abcam, UK), mouse neuron-specific beta III tubulin antibody (ab78078,  
194 Abcam) and rabbit anti-ubiquitin K48 or K63 (Merck, Millipore). The following day,  
195 sections were incubated with Alexa Fluor-conjugated secondary antibodies reactive to  
196 sheep, mouse and rabbit IgG for 1 h at RT. Following staining, coverslips were  
197 mounted onto slides using ProLong Diamond Antifade Mountant (Molecular probes,  
198 USA). All imaging experiments were analysed on a Leica TCS SP5 confocal  
199 microscope.

200

201 **Cell lysis.** NSC-34 cells grown in 6-well plates and transfected with SOD1-GFP or  
202 mRFP-Ub were harvested 48 h post transfection with trypsin/EDTA (Gibco, USA).  
203 Cells were washed with PBS before being resuspended in RIPA buffer (50 mM

204 TrisHCl pH 7.4, 1% (w/v) sodium deoxycholate, 150 mM NaCl, 1 mM EDTA, 1%  
205 TX-100, 0.1% SDS, 10mM NEM, 1 mM sodium orthovanadate, Halt™ Protease  
206 Inhibitor Cocktail (Thermo Scientific, USA)). Protein concentration was determined  
207 by BCA assay.

208

209 **Western blot.** Cell lysates with a total protein concentration of 100 µg were reduced  
210 with β-mercaptoethanol and heated for 10 min at 70 °C before being analysed on a  
211 Mini-PROTEAN TGX Stain-Free Gel (Bio-Rad, USA) for 2 h at 100 V. Proteins  
212 were transferred onto a nitrocellulose membrane (Pall Corporation, USA) using the  
213 standard protocol on the Bio-Rad Trans-Blot Turbo Transfer System. The membrane  
214 was blocked in 5% skim milk powder in Tris buffered saline, 0.2% (v/v) Tween-20  
215 (TBST) for 1 h at RT before probing for Ub with rabbit anti-ubiquitin antibody  
216 (ab137025, Abcam) overnight at 4 °C. The following day the membrane was washed  
217 three times with TBST over 30 min before incubating with horseradish peroxidase-  
218 conjugated anti-rabbit antibody (1706515, Bio-Rad) for 1 h at RT. The membrane was  
219 visualised with chemiluminescent substrate (Thermo Scientific) on the Amersham  
220 Imager 6600RGB.

221

222 **Cell sorting.** NSC-34 cells transfected with SOD1-GFP were harvested 48 h post-  
223 transfection with trypsin-EDTA (Gibco) and washed with PBS before being  
224 resuspended in resuspension buffer (PBS containing 25 mM HEPES, 1 mM EDTA  
225 and 1% FBS) and filtered through a 40 µm nylon mesh strainer (Greiner Bio-One,  
226 Austria). Enrichment of GFP positive cells was performed on a Bio-Rad S3e cell  
227 sorter. Cells were sorted based on GFP fluorescence (excitation 488 nm, emission  
228 525/30nm) and collected into 5 mL FACS tubes containing DMEM/F12

229 supplemented with 10% FBS and 2 × penicillin/streptomycin (Gibco). Following  
230 enrichment, cells were lysed in RIPA buffer (as above) for ubiquitomics analysis.

231

232 **Ubiquitomics.** Proteomics to identify ubiquitin-modified proteome (ubiquitome) in  
233 NSC-34 cells was performed as described in [38]. Cells were lysed in lysis buffer (50  
234 mM Tris-HCl (pH 7.5), 150 mM NaCl, 0.5% NP-40, 1 mM DTT, 1× EDTA-free  
235 protease inhibitor cocktail, 10 mM N-ethylmaleimide, 1 mM sodium orthovanadate).  
236 Protein concentration was determined using a BCA assay and 300 µg of total protein  
237 was used per sample to immunopurify mono- and poly-ubiquitinated proteins using  
238 30 µL of VIVAbind Ub affinity matrix (Ubiquitin Kit, VIVA Bioscience). Samples  
239 were incubated for 2 h at 4 °C with end-to-end mixing then matrix was collected by  
240 centrifugation (1 min; 4 °C; 1000 × g) and washed six times in detergent free wash  
241 buffer (500 µL). After washing, beads were digested for 30 min at 27 °C, then  
242 reduced with 1 mM DTT and left to digest overnight at room temperature with  
243 sequencing-grade trypsin (5 µg/mL, Promega), as described previously [39]. Samples  
244 were alkylated with 5 mg/mL iodoacetamide and protease digestion terminated with  
245 trifluoroacetic acid. Trypsinized eluents were collected after brief centrifugation then  
246 purified and desalted using self-packed tips with 6 layers of C18 Empore disks  
247 (Pacific Laboratory Products), then dried in a SpeedVac. Samples were then  
248 resuspended in 12 µL 5% formic acid, 2% acetonitrile and stored at -80 °C.

249 For nLC-MS/MS analysis, 5 uL of each of the peptide samples were loaded and  
250 separated along a C18 column (400 mm, 75 µm ID, 3 µm silica beads) and introduced  
251 by nanoelectrospray into an LTQ Orbitrap Velos Pro coupled to an Easy-nLC HPLC  
252 (Thermo Fisher). Tandem mass spectrometry data was collected for the top 10 most  
253 abundant ions per scan over a 140-minute time gradient. The order of data collection

254 was randomized to interchange between biological conditions with BSA run between  
255 each sample to minimize temporal bias. MS/MS raw files were analyzed using the  
256 Andromeda search engine integrated into MaxQuant (v1.2.7.4) [40] against the  
257 Uniprot Mouse database. A false discovery rate of 1% was tolerated for protein,  
258 peptide, and sites, and one missed cleavage was allowed. MaxQuant output data were  
259 filtered to remove contaminants, reverse hits, proteins only identified by site and  
260 proteins with < 2 unique peptides [41]. An individual protein was defined as present  
261 under a particular condition if it was detected in a minimum of two replicates.  
262 Protein-protein interactions and KEGG pathway analysis among the resulting protein  
263 list was analyzed using STRING (v10) [42] (with a confidence score of 0.700) and  
264 Cytoscape (v3.1.1) [43].

265

266 **Analysis of Mitochondrial Morphology and Function.** NSC-34 cells transiently  
267 transfected with SOD1-GFP were incubated with 100nM Mitotracker Deep Red FM  
268 (Molecular probes) or Mitotracker CMXRos (Molecular probes) for 30 min at 37 °C  
269 prior to analysis by confocal microscopy or flow cytometry 48 h post transfection.  
270 Mitochondrial morphology was examined using a mitochondrial morphology macro  
271 [44] on ImageJ 1.48v. Mitotracker Red and Mitotracker CMXRos accumulation in  
272 cells expressing high levels of SOD1-GFP was also assessed by flow cytometry  
273 (Becton Dickinson).

274

275

## 276 **Results**

### 277 **SOD1 aggregates are ubiquitylated early**

278 We previously showed that all cellular SOD1 aggregates contained Ub at the time  
279 points tested [45]. Here we used real-time imaging using a Ub fusion protein to follow  
280 inclusion formation in a single cell from its genesis until it had taken up a large  
281 proportion of the cytoplasm. Previous work has demonstrated that the behaviour of  
282 GFP-Ub fusions in cells is indistinguishable from endogenous Ub and provides a  
283 robust fluorescent indicator of Ub distribution [31]. We created a mCherry-Ub fusion  
284 protein that behaved in a similar manner to the GFP fusion protein (supplementary  
285 **Figure S1**). Ub was observed in foci at the earliest detectable stages of SOD1  
286 aggregation (**Figure 2A**, see insert). Ub was continuously added to inclusions  
287 throughout their formation, as was SOD1 (**Figure 2A**). To ensure that the Ub  
288 accumulation in SOD1 inclusions was not an artefact of Ub over expression, we next  
289 probed for endogenous Ub using antibodies. SOD1<sup>A4V</sup> expression causes inclusions in  
290 approximately 15% of NSC-34 cells (**Figure S2**) and in those cells that contain  
291 inclusions we observed a high degree of overlap between SOD1 aggregates and Ub  
292 when using both K48 and K63 chain specific antibodies (**Figure 2B**). We also found  
293 that SOD1 aggregates contained K48 chains in SOD1<sup>G93A</sup> mouse spinal motor  
294 neurons (**Figure 2C**).

295

### 296 **Cells with SOD1 aggregates have increased UPS dysfunction**

297 We previously showed that a UPS reporter containing a CL1 degron peptide for rapid  
298 degradation accumulates to significantly higher amounts in ALS patient fibroblasts  
299 compared to controls, suggesting an overwhelmed UPS [36]. Work from others  
300 suggests that SOD1 aggregates are toxic because they interfere with the quality

301 control function of the juxtannuclear quality control compartment (JUNQ) [20]. To  
302 examine the relationship between SOD1 aggregation and UPS dysfunction we used  
303 transiently transfected NSC-34 cells that contained SOD1<sup>A4V</sup>-GFP and tdTomato<sup>CL1</sup>.  
304 We initially used flow cytometry to examine the effect of proteasome inhibition on  
305 reporter accumulation. While there was a significant difference in reporter signal  
306 between SOD1 and SOD1<sup>A4V</sup> expressing cells, both cell lines showed a similar dose-  
307 dependent increase in reporter signal with MG132 treatment (**Figure 3A**). This  
308 suggests that, while SOD1<sup>A4V</sup> expression causes significant UPS disruption, there is  
309 no specific vulnerability to proteasome inhibition of cells expressing mutant SOD1  
310 compared to wild-type expressing cells.

311

312 However, this analysis examined the entire population of SOD1<sup>WT</sup> or SOD1<sup>A4V</sup>  
313 expressing cells and previous work using a similar CL1-containing fluorescent  
314 reporter suggests that the aggregation of Huntingtin and CFTR cause UPS  
315 dysfunction [46]. We hypothesized that inclusions formed by mutant SOD1 might  
316 influence UPS activity in a similar fashion, a phenomenon that may not be observed  
317 when analysing the entire population of cells, given that only 15% of NSC-34 cells  
318 expressing SOD1<sup>A4V</sup> produce inclusions (**Figure S2**). In order to identify cells with  
319 SOD1 inclusions in our flow cytometry data we tested the relationship between  
320 aggregation and total cellular fluorescence (**Figure 3B**). Cells were transiently  
321 transfected with SOD1<sup>A4V</sup>-GFP and imaged 48 h post transfection using confocal  
322 microscopy. The total cellular fluorescence for individual cells was plotted for both  
323 cells with and without inclusions. The fluorescence of both populations was normally  
324 distributed (**Figure 3B**). The mean fluorescence of cells containing aggregates was  
325 significantly greater than that of cells without aggregates (**Figure 3C**), presumably

326 due to continued accumulation of SOD1 into inclusions. However, there was  
327 significant overlap between the two populations so we could not distinguish  
328 populations entirely. We decided to analyze the most highly fluorescent cells (top  
329 10%) across the entire population. In this subset of cells, approximately 80%  
330 contained SOD1<sup>A4V</sup> inclusions (**Figure 3D**). We reasoned that analyzing the top 10%  
331 fluorescent cells would sufficiently enrich for cells containing inclusions. Using flow  
332 cytometry, we observed a 4× increase in reporter fluorescence ( $P < 0.001$ ) - indicating  
333 UPS dysfunction - in the top 10% of SOD1<sup>A4V</sup>-GFP expressing cells compared to  
334 control cells in the same fluorescence range. That is, UPS dysfunction in SOD1<sup>A4V</sup>  
335 cells is largely restricted to cells containing aggregates. By comparison, only a small  
336 increase (1.2×) in reporter fluorescence was observed in the entire population of  
337 SOD1<sup>A4V</sup>-GFP expressing cells compared with the entire SOD1<sup>WT</sup>-GFP expressing  
338 population ( $P < 0.01$ ) (**Figure 3E**). This suggests that SOD1 aggregation is associated  
339 with compromised UPS function.

340

#### 341 **Ubiquitin pools are disturbed in cells containing SOD1 aggregates**

342 Ub exists in a dynamic equilibrium in the cell, partitioning into four major pools; i)  
343 immobile in the nucleus, ii) immobile in the cytoplasm, iii) soluble polyUb chains and  
344 iv) a small fraction as free monomeric Ub [31]. Mobile Ub is a combination of free  
345 monomeric Ub, free Ub chains and Ub attached to diffusible proteins (**Figure 1**).  
346 Immobile Ub is primarily bound to histones in the nucleus and bound to organelles  
347 and cytoskeleton in the cytoplasm (**Figure 1**). To determine if the observed UPS  
348 dysfunction in cells with mutant SOD1 aggregates was associated with altered Ub  
349 homeostasis we examined the relative distribution of Ub into different cellular pools  
350 following expression of wild-type or mutant SOD1 genes by FRAP (**Figure 4A-E**).

351 The diffusion rate back into the bleached area provides information on the mobility of  
352 the Ub species present in solution and the amount of immobile fluorophore in the  
353 compartment of interest (i.e. bound to membrane vesicles or cytoskeleton in the  
354 cytosol, and bound to histones in the nucleus). We selected ROIs in both the nucleus  
355 and cytoplasm (**Figure 4B**) in cells co-expressing mCherry-Ub and either GFP,  
356 SOD1<sup>WT</sup>-GFP or SOD<sup>A4V</sup>-GFP. In the case of SOD<sup>A4V</sup>-GFP expressing cells, we  
357 performed the analysis on two subpopulations, with and without aggregates. As  
358 previously reported, we find that Ub fluorescence recovery after bleaching (indicating  
359 Ub mobility) is higher in the cytoplasm than in the nucleus, likely due to a large  
360 proportion of nuclear Ub being attached to histones. Patterns of recovery appeared  
361 similar in all treatments, with the exception of a lower cytoplasmic recovery in the  
362 cells containing SOD<sup>A4V</sup>-GFP aggregates (**Figure 4A**). After calculating the mean  
363 half-life ( $T_{1/2}$ ) of recovery in each case, we find no significant differences between  
364 any of the cell populations (**Figure 4D**). This suggests that within the mobile  
365 population of Ub, the presence of SOD<sup>A4V</sup>-GFP aggregates does not significantly alter  
366 the kinetics of Ub diffusion.

367

368 This observation prompted us to investigate whether SOD<sup>A4V</sup>-GFP aggregates alter  
369 the amount of mobile Ub available in the cell. We find that on average, 51% of the  
370 cellular Ub signal is detected in aggregates, indicating that the presence of insoluble  
371 aggregates alters the distribution of the Ub pool (**Figure 4C**). The significance of this  
372 aggregate-associated fraction of Ub is clear in the context of our analysis of the  
373 relative distribution of mobile Ub pools. Based on our FRAP analysis, which does not  
374 consider the aggregate-associated Ub, there is no significant difference in the mobility  
375 of Ub between SOD<sup>A4V</sup>-GFP cells and controls (**Figure 4E**). However, if we correct



376 for the 51% of Ub we know to be immobile in cells with inclusions, we find that the  
377 actual mobile Ub pool in SOD<sup>A4V</sup>-GFP cells is significantly smaller than in controls  
378 (**Figure 4E**).

379

### 380 **Free monomeric ubiquitin is lowered in cells with SOD1 aggregates**

381 To test whether the depletion of mobile Ub in cells containing SOD<sup>A4V</sup>-GFP  
382 aggregates may diminish free monomeric Ub, we next examined the relative amounts  
383 of monomeric Ub in cells expressing GFP, SOD1<sup>WT</sup>-GFP, or SOD<sup>A4V</sup>-GFP for 48 h,  
384 by Western blot (**Figure 5A**). We did not observe any significant differences using  
385 this method, likely due to the fact that this analysis represents a total measure of all  
386 cells in the culture, including non-transfected cells. We therefore turned to  
387 fluorescence recovery after nucleus photobleaching (FRANP) analysis to monitor free  
388 Ub in single cells. Monomeric mCherry-Ub will diffuse through the nuclear pore (<  
389 60 kDa), while mCherry-Ub incorporated into Ub chains will not [31]. Hence, relative  
390 free monomeric Ub can be measured by monitoring diffusion through the nuclear pore  
391 following fluorescence bleaching solely in the nucleus or cytosol [31]. We transfected  
392 cells with GFP, SOD1<sup>WT</sup>-GFP, or SOD<sup>A4V</sup>-GFP (**Figure 5B**) for 48 h, then bleached  
393 the entire nucleus and quantified the amount of relative monomeric Ub diffusing  
394 through the nuclear pore back into the nucleus (**Figure 5C**). We observed a  
395 significant drop in free monomeric Ub in cells containing SOD<sup>A4V</sup>-GFP aggregates,  
396 but no difference in the level of monomeric Ub between cells expressing SOD1<sup>WT</sup> and  
397 SOD<sup>A4V</sup> in the absence of inclusions (**Figure 5D**).

398

### 399 **SOD<sup>A4V</sup>-GFP induced changes in the ubiquitome of NSC34 cells**

400 Free Ub exists in complex equilibrium with multiple conjugated forms and ALS  
401 mutations may induce redistribution of Ub through altered activity in various cellular  
402 pathways. To investigate changes in the Ub-modified proteome (ubiquitome) of cells  
403 expressing SOD<sup>WT</sup> compared with SOD<sup>A4V</sup>-GFP, we performed proteomics following  
404 enrichment of cell lysates for ubiquitylated proteins (**Figure 6A**). We identified 316  
405 ubiquitylated proteins common to cells expressing either wild-type or mutant SOD1.  
406 55 proteins were uniquely present in the ubiquitome of cells expressing mutant SOD1  
407 and 12 unique proteins were identified in the ubiquitome of cells expressing wild-type  
408 SOD1 (**Figure 6B, and Table 1**). Network analysis of known protein-protein  
409 interactions and ontology in the set of ubiquitylated proteins unique to cell expressing  
410 mutant SOD1 using the String database [42] identified a number of enriched  
411 pathways, including metabolic pathways, ubiquitin-proteasome system (UPS),  
412 ribosome and mRNA processing and transport (**Figure 6C**). Expression of a chronic  
413 misfolded protein has previously been observed to increase proteome misfolding and  
414 we have shown that ALS aggregates are composed of supersaturated proteins - that is,  
415 proteins which have expression levels higher than one might predict given their  
416 solubility [5].

417

418 We compared the supersaturation scores for both the unfolded and native states of  
419 ubiquitylated proteins found uniquely in SOD<sup>A4V</sup>-GFP expressing cells to the whole  
420 proteome. The median supersaturation score of these 55 ubiquitylated proteins is 10 ×  
421 higher than the whole proteome in the unfolded state ( $\sigma_u$ ) and 25 x higher than the  
422 whole proteome in the native state ( $\sigma_f$ ) (**Figure 6D**). These data are consistent with  
423 proteome instability and resulting redeployment of Ub driving altered Ub distribution

424 and subsequent impairment of Ub homeostasis upon expression of a chronically  
425 misfolded protein.

### 426 **Cells with SOD1 aggregates have altered mitochondrial morphology and** 427 **function**

428 Pathway analysis of our ubiquitome data (above) indicated specific enrichment of  
429 mitochondrial/metabolic proteins in the ubiquitome of SOD1<sup>A4V</sup>-expressing cells  
430 (**Table 1**), suggesting that Ub redistribution/homeostasis might be associated with  
431 compromised mitochondrial function in these cells. Indeed, previous work has shown  
432 that mutations in SOD1 lead to mitochondrial dysfunction [47-49]. In order to assess  
433 mitochondrial function in SOD1<sup>A4V</sup>-expressing cells, we first examined mitochondrial  
434 morphology using Mitotracker and confocal microscopy (**Figure 7A-C**). We found  
435 that SOD1<sup>A4V</sup>-expressing cells contained a significantly higher number of  
436 mitochondria per cell compared to controls (**Figure 7B**). In addition, we these  
437 mitochondria are significantly more circular than those in control cells (**Figure 7C**).  
438 We quantified mitotracker fluorescence in cells using flow cytometry, as above  
439 focusing on the top 10% most fluorescent cells (based on SOD-GFP expression) to  
440 enrich for cells with aggregates (i.e. when expressing SOD1<sup>A4V</sup>). This subset of  
441 SOD1<sup>A4V</sup>-expressing cells has higher mitotracker fluorescence compared to SOD1<sup>WT</sup>  
442 expressing cells exhibiting the same level of fluorescence - consistent with  
443 accumulation of mitochondria with SOD1<sup>A4V</sup> expression (**Figure 7D**). In the same  
444 subset of aggregate-containing cells we observed increased fluorescence of the  
445 functional reporter CMXRos, suggesting alterations in mitochondrial membrane  
446 potential (**Figure 7E**).

447

448



450 **Discussion**

451 A unifying feature of neurodegenerative diseases such as ALS is the presence of Ub  
452 within insoluble protein aggregates [10, 50, 51]. Beyond labelling substrates for  
453 degradation via the proteasome, Ub is an important regulator of cellular processes  
454 such as transcription, translation, endocytosis and DNA repair. The sequestration of  
455 Ub into inclusions may therefore reduce the availability of free Ub essential for these  
456 processes, compromising cellular function and survival. To gain insight into the  
457 regulation of Ub homeostasis in ALS, we followed the dynamic distribution of Ub at  
458 a single cell level in a well-established SOD1 cell model of ALS. Our results confirm  
459 that the expression of mutant SOD1 leads to UPS dysfunction and corresponding  
460 disruption of Ub homeostasis, suggesting these processes plays a key role in the  
461 development of ALS pathology.

462

463 In cell models, Ub regulates the concentrations of TDP-43 and SOD1 [52, 53], and  
464 proteasome inhibition can trigger their abnormal accumulation. While our previous  
465 work established that SOD1 aggregates contain Ub [45], results here confirm that  
466 SOD1 co-aggregates with Ub, and that Ub is present at the earliest stage of  
467 aggregation. Furthermore, SOD1 aggregates were found to contain both K48 and K63  
468 polyubiquitin chains, signalling degradation via the proteasome and autophagy  
469 pathways, respectively. Interestingly, both K48 and K63-linked ubiquitylation has  
470 been associated with the formation of inclusions [54], with previous studies showing  
471 that K63 polyubiquitination directs misfolded SOD1 to the ubiquitin-aggresome route  
472 when the UPS is inhibited [55]. These data are consistent with the need for tightly  
473 regulated Ub homeostasis in neurons, and suggest any perturbation in this  
474 homeostasis could cause Ub depletion and subsequent toxicity. It is likely that protein

475 aggregation causes Ub depletion, which could then drive further aggregation in a  
476 positive feedback loop (**Figure 8**).

477

478 In the nervous system, the UPS contributes to the regulation of many aspects of  
479 synaptic function, such as neuronal growth and development, neuronal excitability,  
480 neurotransmission, long-term potentiation (LTP) and synapse formation and  
481 elimination [56, 57]. UPS dysfunction is therefore central to neuronal health and  
482 neurodegenerative disease [6]. Impairment of the UPS has been implicated strongly in  
483 the pathogenesis of ALS [52, 58, 59]. Here, we reveal that the aggregation of SOD1  
484 compromises UPS function, decreasing cellular capacity to degrade the proteasome  
485 reporter tdTomato<sup>CL1</sup>. Our findings are consistent with the previous demonstration of  
486 UPS dysfunction in ALS, with accumulation of the fluorescent UPS reporter Ub<sup>G76V</sup>-  
487 GFP observed in the spinal cord and cranial motor neurons of SOD1<sup>G93A</sup> mice [59].  
488 Moreover, a motor neuron specific knockdown of proteasome subunit Rpt3 in the  
489 absence of ALS genetic background results in an ALS phenotype in mice - including  
490 locomotor dysfunction, progressive motor neuron loss and mislocalization of ALS  
491 markers TDP-43, FUS, ubiquilin 2, and optineurin [58]. These data support a model  
492 where a reduction in UPS capacity is sufficient to drive ALS pathology in mice. Not  
493 even overexpression of human mutant TDP-43 gives such an accurate reproduction of  
494 a human ALS-like phenotype in mice. In ALS patient spinal motor neurons, 85%  
495 (38/40) of cytoplasmic TDP-43 foci or inclusions were positive for Ub. In fact, almost  
496 all cellular Ub in these neurons was sequestered within large, skein-like inclusions  
497 [45]. Interestingly, Ub has been found to accumulate in inclusions without the  
498 aggregation of TDP-43 in sporadic ALS [7], suggesting that aggregation of proteins  
499 such as TDP-43, FUS and SOD1 may not be necessary for Ub depletion-induced

500 toxicity. In human skin fibroblasts it has been shown that the UPS reporter GFP<sup>CL1</sup>  
501 accumulates significantly more in ALS patient fibroblasts compared to controls,  
502 suggesting a compromised UPS [36]. This raises the question of whether there are  
503 alternate means to control protein concentration when protein aggregates disrupt  
504 degradation mechanisms. It was recently proposed that widespread transcriptional  
505 repression may serve this purpose in Alzheimer's disease [60].

506

507 The work presented here suggests that the aggregation of misfolded SOD1 alters Ub  
508 homeostasis and subsequently depletes the free Ub pool in cells. Cellular Ub exists in  
509 a complex equilibrium between free and conjugated Ub [31]. Neurons are vulnerable  
510 to free Ub deficiency, which if prolonged may lead to cell death [61, 62]. Many  
511 factors can influence Ub homeostasis. For example, proteasome inhibition depletes  
512 free Ub to as low as 5% of basal levels in less than 2 h [63, 64]. Inhibition of  
513 translation also depletes free Ub through reduced production, while toxicity can be  
514 rescued by overexpression of Ub [65]. Accumulation of ubiquitylated proteins in  
515 inclusions is an important potential mechanism for depletion of free Ub, and in this  
516 context free Ub levels can be partially restored by overexpression or removal of Ub  
517 from the aggregated protein through ubiquitin-specific proteases. It was recently  
518 shown that while the ataxia associated mutation in Usp14 causes reduction in free Ub  
519 and neuromuscular junction dysfunction in mice, overexpression of Ub restored free  
520 Ub levels in motor neurons and improved NMJ structure [66]. Additionally, free Ub  
521 could be increased in cells containing huntingtin aggregates by overexpression of the  
522 de-ubiquitylation enzyme USP14 [67]. Not only did this protect cells from aggregate-  
523 induced toxicity, it also reduced ER stress, which is thought to precede inclusion  
524 formation in ALS models [18]. These data further support the concept that modulation

525 of cellular Ub pools is an important factor in the pathogenesis of neurodegenerative  
526 disease.

527

528 The pathways responsible for modulating Ub homeostasis in ALS are not yet well  
529 understood. Our ubiquitomics analysis of cells expressing SOD1 reveals that the  
530 unique ubiquitome of cells expressing mutant SOD1 is enriched for proteins prone to  
531 aggregation (i.e. supersaturated). This is consistent with findings that proteins  
532 associated with neurodegeneration are supersaturated [5, 25, 26]. Furthermore, a  
533 substantial proportion of the ubiquitylated proteins identified are from pathways  
534 known to be dysfunctional in ALS, including RNA processing, metabolic and  
535 mitochondrial pathways. This is not surprising given that both RNA binding proteins  
536 and oxidative phosphorylation and metabolic pathways are also prone to aggregation  
537 in neurodegeneration [26]. These results suggest that mutations in SOD1 may lead to  
538 mitochondrial dysfunction by disrupting Ub homeostasis. Interestingly, we find that  
539 cells expressing mutant SOD1 had altered mitochondrial morphology and function.  
540 Disturbances to mitochondrial morphology have been previously reported in human  
541 motor neurons carrying the SOD1<sup>A4V</sup> mutation [68] and recent studies have revealed  
542 that mitochondrial impairment occurs soon after proteasome inhibition [69]. In fact,  
543 continued proteasome dysfunction in mouse brain cortical neurons inhibited the  
544 degradation of ubiquitylated mitochondrial proteins and led to the accumulation of  
545 dysfunctional mitochondria [70]. Misfolded proteins such as mutant SOD1 have also  
546 been shown to interact with mitochondrial proteins and translocate into the  
547 mitochondrial matrix, where they accumulate and induce mitochondrial dysfunction  
548 [71-73]. However, this cytotoxicity can be attenuated through the ubiquitylation of  
549 misfolded but non-aggregated SOD1 - which promotes its degradation via the UPS



550 [74]. Collectively, these studies demonstrate an integral functional relationship  
551 between impairment of the UPS and mitochondrial dysfunction, and that modulation  
552 of cellular Ub pools may rescue mitochondrial dysfunction caused by the  
553 accumulation of SOD1.

554

## 555 **Conclusions**

556 In conclusion, we observe that the aggregation of mutant SOD1 leads to altered UPS  
557 activity and redistribution of Ub, causing disrupted Ub homeostasis. Given that Ub  
558 controls many essential cellular pathways that are also dysfunctional in ALS -  
559 including transcription, translation, vesicle transport, mitochondrial function and  
560 apoptosis - these findings suggest that Ub homeostasis is a central feature of ALS  
561 pathogenesis. Further understanding of the contribution of Ub homeostasis to ALS  
562 pathology may be imperative to understanding the molecular pathways underpinning  
563 neurodegenerative disease more broadly.

564

565

566

|     |                                                   |
|-----|---------------------------------------------------|
| 567 | <b>List of abbreviations</b>                      |
| 568 | Amyotrophic lateral sclerosis (ALS)               |
| 569 | Bovine serum albumin (BSA)                        |
| 570 | Deubiquitinating enzymes (DUBS)                   |
| 571 | Familial ALS (fALS)                               |
| 572 | Fluorescence loss in photobleaching (FLIP)        |
| 573 | Fluorescence recovery after photobleaching (FRAP) |
| 574 | Frontotemporal dementia (FTD)                     |
| 575 | Juxtannuclear quality control compartment (JUNQ)  |
| 576 | Long-term potentiation (LTP)                      |
| 577 | Motor neuron disease (MND)                        |
| 578 | Neuromuscular junction (NMJ)                      |
| 579 | Paraformaldehyde (PFA)                            |
| 580 | Phosphate buffered saline (PBS)                   |
| 581 | Region of interest (ROI)                          |
| 582 | Room temperature (RT)                             |
| 583 | Sporadic ALS (sALS)                               |
| 584 | Superoxide dismutase 1 (SOD1)                     |
| 585 | TritonX-100 (TX-100)                              |
| 586 | Ubiquitin (Ub)                                    |
| 587 | Ubiquitin-proteasome system (UPS)                 |
| 588 |                                                   |
| 589 |                                                   |
| 590 |                                                   |
| 591 |                                                   |
| 592 |                                                   |

## 593 **References**

594

- 595 [1] M.R. Turner, O. Hardiman, M. Benatar, B.R. Brooks, A. Chio, M. de Carvalho,  
596 P.G. Ince, C. Lin, R.G. Miller, H. Mitsumoto, G. Nicholson, J. Ravits, P.J. Shaw, M.  
597 Swash, K. Talbot, B.J. Traynor, L.H. Van den Berg, J.H. Veldink, S. Vucic, M.C.  
598 Kiernan, Controversies and priorities in amyotrophic lateral sclerosis, *Lancet*  
599 *Neurol* 12(3) (2013) 310-22.
- 600 [2] S. Chen, P. Sayana, X. Zhang, W. Le, Genetics of amyotrophic lateral sclerosis:  
601 an update, *Mol Neurodegener* 8 (2013) 28.
- 602 [3] E.T. Cirulli, B.N. Lasseigne, S. Petrovski, P.C. Sapp, P.A. Dion, C.S. Leblond, J.  
603 Couthouis, Y.F. Lu, Q. Wang, B.J. Krueger, Z. Ren, J. Keebler, Y. Han, S.E. Levy, B.E.  
604 Boone, J.R. Wimbish, L.L. Waite, A.L. Jones, J.P. Carulli, A.G. Day-Williams, J.F.  
605 Staropoli, W.W. Xin, A. Chesi, A.R. Raphael, D. McKenna-Yasek, J. Cady, J.M.  
606 Vianney de Jong, K.P. Kenna, B.N. Smith, S. Topp, J. Miller, A. Gkazi, F.S.  
607 Consortium, A. Al-Chalabi, L.H. van den Berg, J. Veldink, V. Silani, N. Ticozzi, C.E.  
608 Shaw, R.H. Baloh, S. Appel, E. Simpson, C. Lagier-Tourenne, S.M. Pulst, S. Gibson,  
609 J.Q. Trojanowski, L. Elman, L. McCluskey, M. Grossman, N.A. Shneider, W.K.  
610 Chung, J.M. Ravits, J.D. Glass, K.B. Sims, V.M. Van Deerlin, T. Maniatis, S.D. Hayes,  
611 A. Ordureau, S. Swarup, J. Landers, F. Baas, A.S. Allen, R.S. Bedlack, J.W. Harper,  
612 A.D. Gitler, G.A. Rouleau, R. Brown, M.B. Harms, G.M. Cooper, T. Harris, R.M.  
613 Myers, D.B. Goldstein, Exome sequencing in amyotrophic lateral sclerosis  
614 identifies risk genes and pathways, *Science* (2015).
- 615 [4] K.L. Williams, S. Topp, S. Yang, B. Smith, J.A. Fifita, S.T. Warraich, K.Y. Zhang, N.  
616 Farrarwell, C. Vance, X. Hu, A. Chesi, C.S. Leblond, A. Lee, S.L. Rayner, V.  
617 Sundaramoorthy, C. Dobson-Stone, M.P. Molloy, M. van Blitterswijk, D.W.  
618 Dickson, R.C. Petersen, N.R. Graff-Radford, B.F. Boeve, M.E. Murray, C. Pottier, E.  
619 Don, C. Winnick, E.P. McCann, A. Hogan, H. Daoud, A. Levert, P.A. Dion, J. Mitsui, H.  
620 Ishiura, Y. Takahashi, J. Goto, J. Kost, C. Gellera, A.S. Gkazi, J. Miller, J. Stockton,  
621 W.S. Brooks, K. Boundy, M. Polak, J.L. Munoz-Blanco, J. Esteban-Perez, A. Rabano,  
622 O. Hardiman, K.E. Morrison, N. Ticozzi, V. Silani, J. de Belleruche, J.D. Glass, J.B.  
623 Kwok, G.J. Guillemain, R.S. Chung, S. Tsuji, R.H. Brown, Jr., A. Garcia-Redondo, R.  
624 Rademakers, J.E. Landers, A.D. Gitler, G.A. Rouleau, N.J. Cole, J.J. Yerbury, J.D.  
625 Atkin, C.E. Shaw, G.A. Nicholson, I.P. Blair, C9orf72 mutations in amyotrophic lateral  
626 sclerosis and frontotemporal dementia, *Nat Commun* 7 (2016) 11253.
- 627 [5] P. Ciryam, I.A. Lambert-Smith, D.M. Bean, R. Freer, F. Cid, G.G. Tartaglia, D.N.  
628 Saunders, M.R. Wilson, S.G. Oliver, R.I. Morimoto, C.M. Dobson, M. Vendruscolo, G.  
629 Favrin, J.J. Yerbury, Spinal motor neuron protein supersaturation patterns are  
630 associated with inclusion body formation in ALS, *Proc Natl Acad Sci U S A*  
631 (2017).
- 632 [6] J.J. Yerbury, L. Ooi, A. Dillin, D.N. Saunders, D.M. Hatters, P.M. Beart, N.R.  
633 Cashman, M.R. Wilson, H. Ecroyd, Walking the tightrope: proteostasis and  
634 neurodegenerative disease, *J Neurochem* 137(4) (2016) 489-505.
- 635 [7] M.T. Giordana, M. Piccinini, S. Grifoni, G. De Marco, M. Vercellino, M.  
636 Magistrello, A. Pellerino, B. Buccinna, E. Lupino, M.T. Rinaudo, TDP-43  
637 redistribution is an early event in sporadic amyotrophic lateral sclerosis, *Brain*  
638 *Pathol* 20(2) (2010) 351-60.
- 639 [8] J. Brettschneider, K. Arai, K. Del Tredici, J.B. Toledo, J.L. Robinson, E.B. Lee, S.  
640 Kuwabara, K. Shibuya, D.J. Irwin, L. Fang, V.M. Van Deerlin, L. Elman, L.  
641 McCluskey, A.C. Ludolph, V.M. Lee, H. Braak, J.Q. Trojanowski, TDP-43 pathology

- 642 and neuronal loss in amyotrophic lateral sclerosis spinal cord, *Acta Neuropathol*  
643 128(3) (2014) 423-37.
- 644 [9] N. Ticozzi, A. Ratti, V. Silani, Protein aggregation and defective RNA  
645 metabolism as mechanisms for motor neuron damage, *CNS and Neurological*  
646 *Disorders - Drug Targets* 9(3) (2010) 285-296.
- 647 [10] P.N. Leigh, H. Whitwell, O. Garofalo, J. Buller, M. Swash, J.E. Martin, J.M. Gallo,  
648 R.O. Weller, B.H. Anderton, Ubiquitin-immunoreactive intraneuronal inclusions  
649 in amyotrophic lateral sclerosis. Morphology, distribution, and specificity, *Brain*  
650 114(2) (1991) 775-788.
- 651 [11] M.J. Strong, S. Kesavapany, H.C. Pant, The pathobiology of amyotrophic  
652 lateral sclerosis: A proteinopathy?, *Journal of Neuropathology and Experimental*  
653 *Neurology* 64(8) (2005) 649-664.
- 654 [12] L. McAlary, J.A. Aquilina, J.J. Yerbury, Susceptibility of Mutant SOD1 to Form  
655 a Destabilized Monomer Predicts Cellular Aggregation and Toxicity but Not In  
656 vitro Aggregation Propensity, *Front Neurosci* 10 (2016) 499.
- 657 [13] R. Zeineddine, J.F. Pundavela, L. Corcoran, E.M. Stewart, D. Do-Ha, M. Bax, G.  
658 Guillemin, K.L. Vine, D.M. Hatters, H. Ecroyd, C.M. Dobson, B.J. Turner, L. Ooi, M.R.  
659 Wilson, N.R. Cashman, J.J. Yerbury, SOD1 protein aggregates stimulate  
660 macropinocytosis in neurons to facilitate their propagation, *Mol Neurodegener*  
661 10 (2015) 57.
- 662 [14] C. Munch, J. O'Brien, A. Bertolotti, Prion-like propagation of mutant  
663 superoxide dismutase-1 misfolding in neuronal cells, *Proc Natl Acad Sci U S A*  
664 108(9) (2011) 3548-53.
- 665 [15] V. Sundaramoorthy, A.K. Walker, J. Yerbury, K.Y. Soo, M.A. Farg, V. Hoang, R.  
666 Zeineddine, D. Spencer, J.D. Atkin, Extracellular wildtype and mutant SOD1  
667 induces ER-Golgi pathology characteristic of amyotrophic lateral sclerosis in  
668 neuronal cells, *Cell Mol Life Sci* 70(21) (2013) 4181-95.
- 669 [16] L.I. Grad, J.J. Yerbury, B.J. Turner, W.C. Guest, E. Pokrishevsky, M.A. O'Neill, A.  
670 Yanai, J.M. Silverman, R. Zeineddine, L. Corcoran, J.R. Kumita, L.M. Luheshi, M.  
671 Yousefi, B.M. Coleman, A.F. Hill, S.S. Plotkin, I.R. Mackenzie, N.R. Cashman,  
672 Intercellular propagated misfolding of wild-type Cu/Zn superoxide dismutase  
673 occurs via exosome-dependent and -independent mechanisms, *Proc Natl Acad*  
674 *Sci U S A* 111(9) (2014) 3620-5.
- 675 [17] L. McAlary, J.J. Yerbury, J.A. Aquilina, Glutathionylation potentiates benign  
676 superoxide dismutase 1 variants to the toxic forms associated with amyotrophic  
677 lateral sclerosis, *Sci Rep* 3 (2013) 3275.
- 678 [18] J.D. Atkin, M.A. Farg, K.Y. Soo, A.K. Walker, M. Halloran, B.J. Turner, P. Nagley,  
679 M.K. Horne, Mutant SOD1 inhibits ER-Golgi transport in amyotrophic lateral  
680 sclerosis, *J Neurochem* 129(1) (2014) 190-204.
- 681 [19] A.S. Tsvetkov, M. Arrasate, S. Barmada, D.M. Ando, P. Sharma, B.A. Shaby, S.  
682 Finkbeiner, Proteostasis of polyglutamine varies among neurons and predicts  
683 neurodegeneration, *Nat Chem Biol* 9(9) (2013) 586-92.
- 684 [20] S.J. Weisberg, R. Lyakhovetsky, A.C. Werdiger, A.D. Gitler, Y. Soen, D.  
685 Kaganovich, Compartmentalization of superoxide dismutase 1 (SOD1G93A)  
686 aggregates determines their toxicity, *Proc Natl Acad Sci U S A* 109(39) (2012)  
687 15811-6.
- 688 [21] F. Chiti, C.M. Dobson, Protein misfolding, functional amyloid, and human  
689 disease, *Annu Rev Biochem* 75 (2006) 333-66.

- 690 [22] M.Y. Sherman, A.L. Goldberg, Cellular defenses against unfolded proteins: a  
691 cell biologist thinks about neurodegenerative diseases, *Neuron* 29(1) (2001) 15-  
692 32.
- 693 [23] J.J. Yerbury, J.R. Kumita, Protein chemistry of amyloid fibrils and  
694 chaperones: Implications for amyloid formation and disease, *Current Chemical*  
695 *Biology* 4(2) (2010) 89-98.
- 696 [24] Q. Huang, M.E. Figueiredo-Pereira, Ubiquitin/proteasome pathway  
697 impairment in neurodegeneration: Therapeutic implications, *Apoptosis* 15(11)  
698 (2010) 1292-1311.
- 699 [25] P. Ciryam, G.G. Tartaglia, R.I. Morimoto, C.M. Dobson, M. Vendruscolo,  
700 Widespread aggregation and neurodegenerative diseases are associated with  
701 supersaturated proteins, *Cell Rep* 5(3) (2013) 781-90.
- 702 [26] P. Ciryam, R. Kundra, R.I. Morimoto, C.M. Dobson, M. Vendruscolo,  
703 Supersaturation is a major driving force for protein aggregation in  
704 neurodegenerative diseases, *Trends Pharmacol Sci* 36(2) (2015) 72-7.
- 705 [27] S. Boeynaems, E. Bogaert, D. Kovacs, A. Konijnenberg, E. Timmerman, A.  
706 Volkov, M. Guharoy, M. De Decker, T. Jaspers, V.H. Ryan, A.M. Janke, P. Baatsen, T.  
707 Vercruyssen, R.M. Kolaitis, D. Daelemans, J.P. Taylor, N. Kedersha, P. Anderson, F.  
708 Impens, F. Sobott, J. Schymkowitz, F. Rousseau, N.L. Fawzi, W. Robberecht, P. Van  
709 Damme, P. Tompa, L. Van Den Bosch, Phase Separation of C9orf72 Dipeptide  
710 Repeats Perturbs Stress Granule Dynamics, *Mol Cell* 65(6) (2017) 1044-1055 e5.
- 711 [28] A. Hershko, A. Ciechanover, The ubiquitin system, *Annu Rev Biochem* 67  
712 (1998) 425-79.
- 713 [29] A. Ciechanover, P. Brundin, The ubiquitin proteasome system in  
714 neurodegenerative diseases: sometimes the chicken, sometimes the egg, *Neuron*  
715 40(2) (2003) 427-46.
- 716 [30] C.M. Pickart, Mechanisms underlying ubiquitination, *Annu Rev Biochem* 70  
717 (2001) 503-33.
- 718 [31] N.P. Dantuma, T.A. Groothuis, F.A. Salomons, J. Neefjes, A dynamic ubiquitin  
719 equilibrium couples proteasomal activity to chromatin remodeling, *J Cell Biol*  
720 173(1) (2006) 19-26.
- 721 [32] T.A. Groothuis, N.P. Dantuma, J. Neefjes, F.A. Salomons, Ubiquitin crosstalk  
722 connecting cellular processes, *Cell Div* 1 (2006) 21.
- 723 [33] B.J. Turner, J.D. Atkin, M.A. Farg, D.W. Zang, A. Rembach, E.C. Lopes, J.D.  
724 Patch, A.F. Hill, S.S. Cheema, Impaired extracellular secretion of mutant  
725 superoxide dismutase 1 associates with neurotoxicity in familial amyotrophic  
726 lateral sclerosis, *J Neurosci* 25(1) (2005) 108-17.
- 727 [34] S. Bergink, F.A. Salomons, D. Hoogstraten, T.A. Groothuis, H. de Waard, J. Wu,  
728 L. Yuan, E. Citterio, A.B. Houtsmuller, J. Neefjes, J.H. Hoeijmakers, W. Vermeulen,  
729 N.P. Dantuma, DNA damage triggers nucleotide excision repair-dependent  
730 monoubiquitylation of histone H2A, *Genes Dev* 20(10) (2006) 1343-52.
- 731 [35] N.R. Cashman, H.D. Durham, J.K. Blusztajn, K. Oda, T. Tabira, I.T. Shaw, S.  
732 Dahrouge, J.P. Antel, Neuroblastoma x spinal cord (NSC) hybrid cell lines  
733 resemble developing motor neurons, *Dev Dyn* 194(3) (1992) 209-21.
- 734 [36] S. Yang, K.Y. Zhang, R. Kariawasam, M. Bax, J.A. Fifita, L. Ooi, J.J. Yerbury, G.A.  
735 Nicholson, I.P. Blair, Evaluation of Skin Fibroblasts from Amyotrophic Lateral  
736 Sclerosis Patients for the Rapid Study of Pathological Features, *Neurotox Res*  
737 28(2) (2015) 138-46.

- 738 [37] C.A. Schneider, W.S. Rasband, K.W. Eliceiri, NIH Image to ImageJ: 25 years of  
739 image analysis, *Nat Methods* 9(7) (2012) 671-5.
- 740 [38] S.R. Nagarajan, A.E. Brandon, J.A. McKenna, H.C. Shtein, T.Q. Nguyen, E.  
741 Suryana, P. Poronnik, G.J. Cooney, D.N. Saunders, A.J. Hoy, Insulin and diet-  
742 induced changes in the ubiquitin-modified proteome of rat liver, *PLoS One* 12(3)  
743 (2017) e0174431.
- 744 [39] B. Turriziani, A. Garcia-Munoz, R. Pilkington, C. Raso, W. Kolch, A. von  
745 Kriegsheim, On-beads digestion in conjunction with data-dependent mass  
746 spectrometry: a shortcut to quantitative and dynamic interaction proteomics,  
747 *Biology (Basel)* 3(2) (2014) 320-32.
- 748 [40] J. Cox, M. Mann, MaxQuant enables high peptide identification rates,  
749 individualized p.p.b.-range mass accuracies and proteome-wide protein  
750 quantification, *Nat Biotechnol* 26(12) (2008) 1367-72.
- 751 [41] D.R. Croucher, M. Iconomou, J.F. Hastings, S.P. Kennedy, J.Z. Han, R.F.  
752 Shearer, J. McKenna, A. Wan, J. Lau, S. Aparicio, D.N. Saunders, Bimolecular  
753 complementation affinity purification (BiCAP) reveals dimer-specific protein  
754 interactions for ERBB2 dimers, *Sci Signal* 9(436) (2016) ra69.
- 755 [42] D. Szklarczyk, A. Franceschini, S. Wyder, K. Forslund, D. Heller, J. Huerta-  
756 Cepas, M. Simonovic, A. Roth, A. Santos, K.P. Tsafou, M. Kuhn, P. Bork, L.J. Jensen,  
757 C. von Mering, STRING v10: protein-protein interaction networks, integrated  
758 over the tree of life, *Nucleic Acids Res* 43(Database issue) (2015) D447-52.
- 759 [43] M.E. Smoot, K. Ono, J. Ruscheinski, P.L. Wang, T. Ideker, Cytoscape 2.8: new  
760 features for data integration and network visualization, *Bioinformatics* 27(3)  
761 (2011) 431-2.
- 762 [44] R.K. Dagda, S.J. Cherra, 3rd, S.M. Kulich, A. Tandon, D. Park, C.T. Chu, Loss of  
763 PINK1 function promotes mitophagy through effects on oxidative stress and  
764 mitochondrial fission, *J Biol Chem* 284(20) (2009) 13843-55.
- 765 [45] N.E. Farrarwell, I.A. Lambert-Smith, S.T. Warraich, I.P. Blair, D.N. Saunders,  
766 D.M. Hatters, J.J. Yerbury, Distinct partitioning of ALS associated TDP-43, FUS and  
767 SOD1 mutants into cellular inclusions, *Sci Rep* 5 (2015) 13416.
- 768 [46] N.F. Bence, R.M. Sampat, R.R. Kopito, Impairment of the ubiquitin-  
769 proteasome system by protein aggregation, *Science* 292(5521) (2001) 1552-5.
- 770 [47] M. Mattiazzi, M. D'Aurelio, C.D. Gajewski, K. Martushova, M. Kiaei, M.F. Beal,  
771 G. Manfredi, Mutated human SOD1 causes dysfunction of oxidative  
772 phosphorylation in mitochondria of transgenic mice, *J Biol Chem* 277(33) (2002)  
773 29626-33.
- 774 [48] C. Vande Velde, K.K. McDonald, Y. Boukhedimi, M. McAlonis-Downes, C.S.  
775 Lobsiger, S. Bel Hadj, A. Zandona, J.P. Julien, S.B. Shah, D.W. Cleveland, Misfolded  
776 SOD1 associated with motor neuron mitochondria alters mitochondrial shape  
777 and distribution prior to clinical onset, *PLoS One* 6(7) (2011) e22031.
- 778 [49] W. Song, Y. Song, B. Kincaid, B. Bossy, E. Bossy-Wetzl, Mutant SOD1G93A  
779 triggers mitochondrial fragmentation in spinal cord motor neurons:  
780 neuroprotection by SIRT3 and PGC-1alpha, *Neurobiol Dis* 51 (2013) 72-81.
- 781 [50] J. Lowe, A. Blanchard, K. Morrell, G. Lennox, L. Reynolds, M. Billett, M.  
782 Landon, R.J. Mayer, Ubiquitin is a common factor in intermediate filament  
783 inclusion bodies of diverse type in man, including those of Parkinson's disease,  
784 Pick's disease, and Alzheimer's disease, as well as Rosenthal fibres in cerebellar  
785 astrocytomas, cytoplasmic bodies in muscle, and mallory bodies in alcoholic liver  
786 disease, *J Pathol* 155(1) (1988) 9-15.

- 787 [51] H. Mori, J. Kondo, Y. Ihara, Ubiquitin is a component of paired helical  
788 filaments in Alzheimer's disease, *Science* 235(4796) (1987) 1641-4.
- 789 [52] E.L. Scotter, C. Vance, A.L. Nishimura, Y.B. Lee, H.J. Chen, H. Urwin, V.  
790 Sardone, J.C. Mitchell, B. Rogelj, D.C. Rubinsztein, C.E. Shaw, Differential roles of  
791 the ubiquitin proteasome system and autophagy in the clearance of soluble and  
792 aggregated TDP-43 species, *J Cell Sci* 127(Pt 6) (2014) 1263-78.
- 793 [53] K. Miyazaki, T. Fujita, T. Ozaki, C. Kato, Y. Kurose, M. Sakamoto, S. Kato, T.  
794 Goto, Y. Itoyama, M. Aoki, A. Nakagawara, NEDL1, a novel ubiquitin-protein  
795 isopeptide ligase for dishevelled-1, targets mutant superoxide dismutase-1, *J Biol*  
796 *Chem* 279(12) (2004) 11327-35.
- 797 [54] J.M. Tan, E.S. Wong, D.S. Kirkpatrick, O. Pletnikova, H.S. Ko, S.P. Tay, M.W. Ho,  
798 J. Troncoso, S.P. Gygi, M.K. Lee, V.L. Dawson, T.M. Dawson, K.L. Lim, Lysine 63-  
799 linked ubiquitination promotes the formation and autophagic clearance of  
800 protein inclusions associated with neurodegenerative diseases, *Hum Mol Genet*  
801 17(3) (2008) 431-9.
- 802 [55] H. Wang, Z. Ying, G. Wang, Ataxin-3 regulates aggresome formation of  
803 copper-zinc superoxide dismutase (SOD1) by editing K63-linked polyubiquitin  
804 chains, *J Biol Chem* 287(34) (2012) 28576-85.
- 805 [56] A.M. Mabb, M.D. Ehlers, Ubiquitination in postsynaptic function and  
806 plasticity, *Annu Rev Cell Dev Biol* 26 (2010) 179-210.
- 807 [57] H. Kawabe, N. Brose, The role of ubiquitylation in nerve cell development,  
808 *Nat Rev Neurosci* 12(5) (2011) 251-68.
- 809 [58] Y. Tashiro, M. Urushitani, H. Inoue, M. Koike, Y. Uchiyama, M. Komatsu, K.  
810 Tanaka, M. Yamazaki, M. Abe, H. Misawa, K. Sakimura, H. Ito, R. Takahashi, Motor  
811 neuron-specific disruption of proteasomes, but not autophagy, replicates  
812 amyotrophic lateral sclerosis, *J Biol Chem* 287(51) (2012) 42984-94.
- 813 [59] C. Cheroni, M. Marino, M. Tortarolo, P. Veglianese, S. De Biasi, E. Fontana,  
814 L.V. Zuccarello, C.J. Maynard, N.P. Dantuma, C. Bendotti, Functional alterations of  
815 the ubiquitin-proteasome system in motor neurons of a mouse model of familial  
816 amyotrophic lateral sclerosis, *Hum Mol Genet* 18(1) (2009) 82-96.
- 817 [60] P. Ciryam, R. Kundra, R. Freer, R.I. Morimoto, C.M. Dobson, M. Vendruscolo,  
818 A transcriptional signature of Alzheimer's disease is associated with a  
819 metastable subproteome at risk for aggregation, *Proc Natl Acad Sci U S A*  
820 113(17) (2016) 4753-8.
- 821 [61] Z. Tan, W. Qu, W. Tu, W. Liu, M. Baudry, S.S. Schreiber, p53 accumulation due  
822 to down-regulation of ubiquitin: relevance for neuronal apoptosis, *Cell Death*  
823 *Differ* 7(7) (2000) 675-81.
- 824 [62] Z. Tan, W. Tu, S.S. Schreiber, Downregulation of free ubiquitin: a novel  
825 mechanism of p53 stabilization and neuronal cell death, *Brain Res Mol Brain Res*  
826 91(1-2) (2001) 179-88.
- 827 [63] E.G. Mimnaugh, H.Y. Chen, J.R. Davie, J.E. Celis, L. Neckers, Rapid  
828 deubiquitination of nucleosomal histones in human tumor cells caused by  
829 proteasome inhibitors and stress response inducers: effects on replication,  
830 transcription, translation, and the cellular stress response, *Biochemistry* 36(47)  
831 (1997) 14418-29.
- 832 [64] A. Patnaik, V. Chau, J.W. Wills, Ubiquitin is part of the retrovirus budding  
833 machinery, *Proc Natl Acad Sci U S A* 97(24) (2000) 13069-74.
- 834 [65] J. Hanna, D.S. Leggett, D. Finley, Ubiquitin depletion as a key mediator of  
835 toxicity by translational inhibitors, *Mol Cell Biol* 23(24) (2003) 9251-61.

836 [66] J.H. Vaden, J.A. Watson, A.D. Howard, P.C. Chen, J.A. Wilson, S.M. Wilson,  
837 Distinct effects of ubiquitin overexpression on NMJ structure and motor  
838 performance in mice expressing catalytically inactive USP14, *Front Mol Neurosci*  
839 *8* (2015) 11.

840 [67] A. Hyrskyluoto, C. Bruelle, S.H. Lundh, H.T. Do, J. Kivinen, E. Rappou, S.  
841 Reijonen, T. Waltimo, A. Petersen, D. Lindholm, L. Korhonen, Ubiquitin-specific  
842 protease-14 reduces cellular aggregates and protects against mutant huntingtin-  
843 induced cell degeneration: involvement of the proteasome and ER stress-  
844 activated kinase IRE1alpha, *Hum Mol Genet* (2014).

845 [68] E. Kiskinis, J. Sandoe, L.A. Williams, G.L. Boulting, R. Moccia, B.J. Wainger, S.  
846 Han, T. Peng, S. Thams, S. Mikkilineni, C. Mellin, F.T. Merkle, B.N. Davis-  
847 Dusenbery, M. Ziller, D. Oakley, J. Ichida, S. Di Costanzo, N. Atwater, M.L. Maeder,  
848 M.J. Goodwin, J. Nemesh, R.E. Handsaker, D. Paull, S. Noggle, S.A. McCarroll, J.K.  
849 Joung, C.J. Woolf, R.H. Brown, K. Eggan, Pathways disrupted in human ALS motor  
850 neurons identified through genetic correction of mutant SOD1, *Cell Stem Cell*  
851 *14*(6) (2014) 781-95.

852 [69] S. Maharjan, M. Oku, M. Tsuda, J. Hoseki, Y. Sakai, Mitochondrial impairment  
853 triggers cytosolic oxidative stress and cell death following proteasome inhibition,  
854 *Sci Rep* *4* (2014) 5896.

855 [70] A. Ugun-Klusek, M.H. Tatham, J. Elkharaz, D. Constantin-Teodosiu, K. Lawler,  
856 H. Mohamed, S.M. Paine, G. Anderson, R. John Mayer, J. Lowe, E. Ellen Billett, L.  
857 Bedford, Continued 26S proteasome dysfunction in mouse brain cortical neurons  
858 impairs autophagy and the Keap1-Nrf2 oxidative defence pathway, *Cell Death*  
859 *Dis* *8*(1) (2017) e2531.

860 [71] C. Vijayvergiya, M.F. Beal, J. Buck, G. Manfredi, Mutant superoxide dismutase  
861 1 forms aggregates in the brain mitochondrial matrix of amyotrophic lateral  
862 sclerosis mice, *J Neurosci* *25*(10) (2005) 2463-70.

863 [72] D. Jaarsma, F. Rognoni, W. van Duijn, H.W. Verspaget, E.D. Haasdijk, J.C.  
864 Holstege, CuZn superoxide dismutase (SOD1) accumulates in vacuolated  
865 mitochondria in transgenic mice expressing amyotrophic lateral sclerosis-linked  
866 SOD1 mutations, *Acta Neuropathol* *102*(4) (2001) 293-305.

867 [73] L. Ruan, C. Zhou, E. Jin, A. Kucharavy, Y. Zhang, Z. Wen, L. Florens, R. Li,  
868 Cytosolic proteostasis through importing of misfolded proteins into  
869 mitochondria, *Nature* (2017).

870 [74] R. Yonashiro, A. Sugiura, M. Miyachi, T. Fukuda, N. Matsushita, R. Inatome, Y.  
871 Ogata, T. Suzuki, N. Dohmae, S. Yanagi, Mitochondrial ubiquitin ligase MITOL  
872 ubiquitinates mutant SOD1 and attenuates mutant SOD1-induced reactive  
873 oxygen species generation, *Mol Biol Cell* *20*(21) (2009) 4524-30.

874  
875  
876  
877  
878  
879  
880  
881  
882  
883  
884



885 **Declarations**

886

887 **Ethics approval and consent to participate**

888 Not applicable

889

890 **Consent for publication**

891 Not applicable

892

893 **Availability of data and material**

894 The datasets used and/or analysed during the current study available from the  
895 corresponding author on reasonable request.

896

897 **Competing interests**

898 The authors declare that they have no competing interests

899

900 **Funding**

901 I.A.L.S was supported by Rotary Health Australia. P.C. was supported by grants from  
902 the US-UK Fulbright Commission, St. John's College, University of Cambridge, and  
903 the National Institutes of Health (Northwestern University Medical Scientist Training  
904 Program Grant T32 GM8152-28). D.N.S, K.L.V and J.J.Y were supported by US  
905 Department of Defence (AL150057) and the Motor Neuron Disease Research Institute  
906 of Australia (Cunningham Family MND Research Grant, GIA1656).

907 J.J.Y was also supported by grants from the National Health and Medical Research  
908 Council (1095215, 1084144).

909

910

911 **Authors' contributions**

912 N.E.F, P.C, L.M, K.L.V, D.N.S, and J.J.Y designed research; N.E.F, P.C, I.A.L.S,  
913 L.M, J.M, and K.M performed research; N.E.F, I.A.L.S, P.C, L.M, K.L.V, D.N.S, and  
914 J.J.Y analyzed data; and N.E.F, P.C, D.N.S, and J.J.Y wrote the paper. All authors  
915 read and approved the final manuscript.

916

917 **Acknowledgements**

918 Not applicable

919

920 Authors' information (optional)

921

922

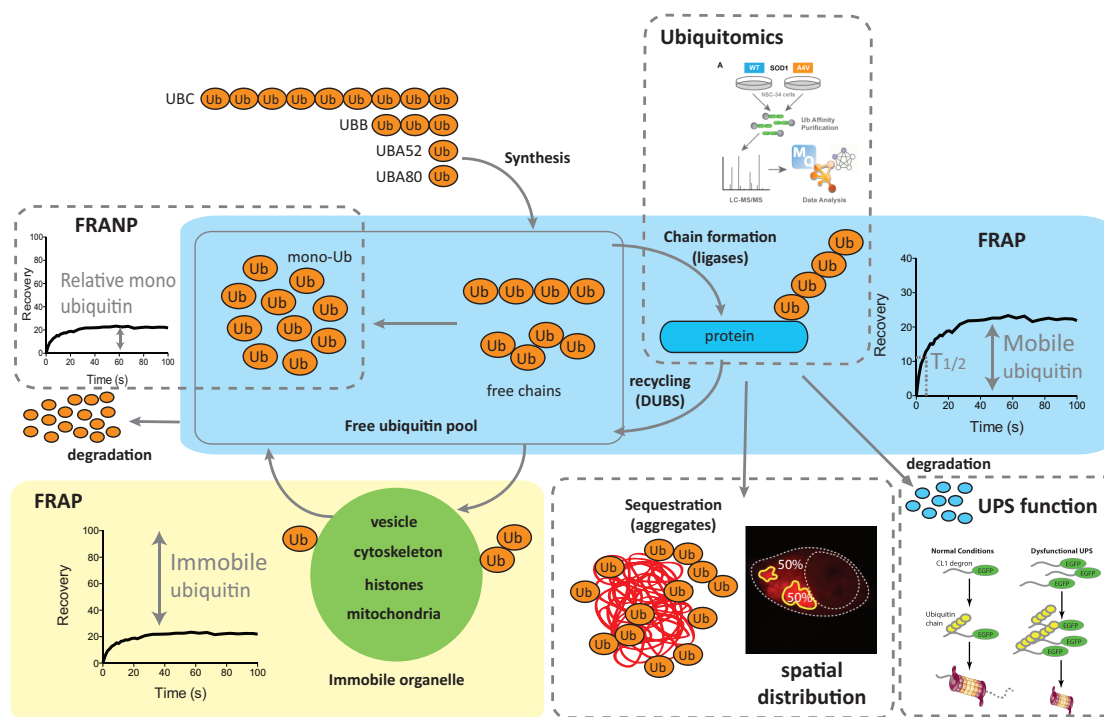

923  
924  
925  
926  
927  
928  
929  
930  
931  
932  
933  
934  
935  
936  
937  
938  
939  
940  
941  
942  
943  
944  
945  
946  
947

**Figure 1: Ubiquitin exists in a dynamic equilibrium in the cell, partitioning into mobile and immobile fractions.** Schematic representation of Ub homeostasis, showing the different methods used to interrogate various aspects of this system in this study. Ub is synthesised from several genes, generating a pool of free Ub that consists of monomeric and polymeric chains of Ub. Ub can be conjugated with substrate proteins via the enzymatic activity of a large number of Ub ligases. The cellular fate or outcome of such ubiquitylation is dictated by the chain type formed by Ub. The mobile fraction of Ub measured by fluorescence recovery after photobleaching (FRAP) is the sum of monomeric and polymeric free Ub and diffusible ubiquitylated protein (blue box). The immobile pool of Ub is that conjugated to large slowly diffusing structures such as vesicles, organelles, histones and cytoskeleton (green box). Ubiquitin proteasome system (UPS) degradation function can be compared using fluorescent reporters. Generally accumulation of reporters suggests increased competition, or decreased rates of degradation. The ubiquitin-modified proteome can be quantified using enrichment capture and mass spectrometry (ubiquitomics). A subset of mobile Ub is free monomeric Ub can be measured using fluorescence recovery after nucleus photobleaching (FRANP). Monomeric Ub is the only form of tagged Ub that can diffuse through the nuclear pore, so by bleaching the entire nucleus we can measure monomeric Ub as it diffuses back in. In the context of protein aggregation a proportion of Ub is conjugated to substrates within the inclusions, we can quantify the proportion of Ub incorporated into inclusions using image analysis.

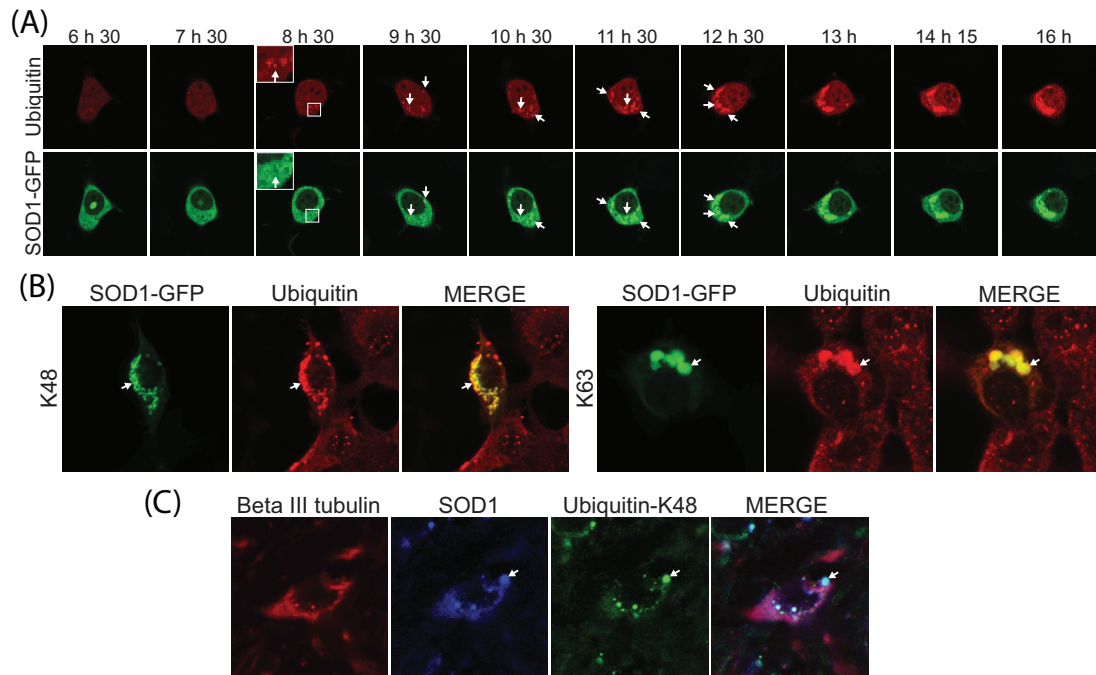

948  
949  
950  
951  
952  
953  
954  
955  
956

**Figure 2: SOD1 co-aggregates with ubiquitin.** (A) NSC-34 cells co-transfected with SOD1<sup>A4V</sup>-GFP and mRFP-Ub were imaged every 15 min for 17 h. (B) NSC-34 cells overexpressing SOD1<sup>A4V</sup>-GFP were fixed, permeabilized and stained for Ub<sub>K48</sub> and Ub<sub>K63</sub> polyubiquitin chains 48 h post transfection. (C) Spinal cord from the SOD1<sup>G93A</sup> mouse was fixed, permeabilized and stained for neuron-specific beta III tubulin, SOD1 and Ub<sub>K48</sub>. Co-localization of SOD1 and Ub is indicated with arrows.

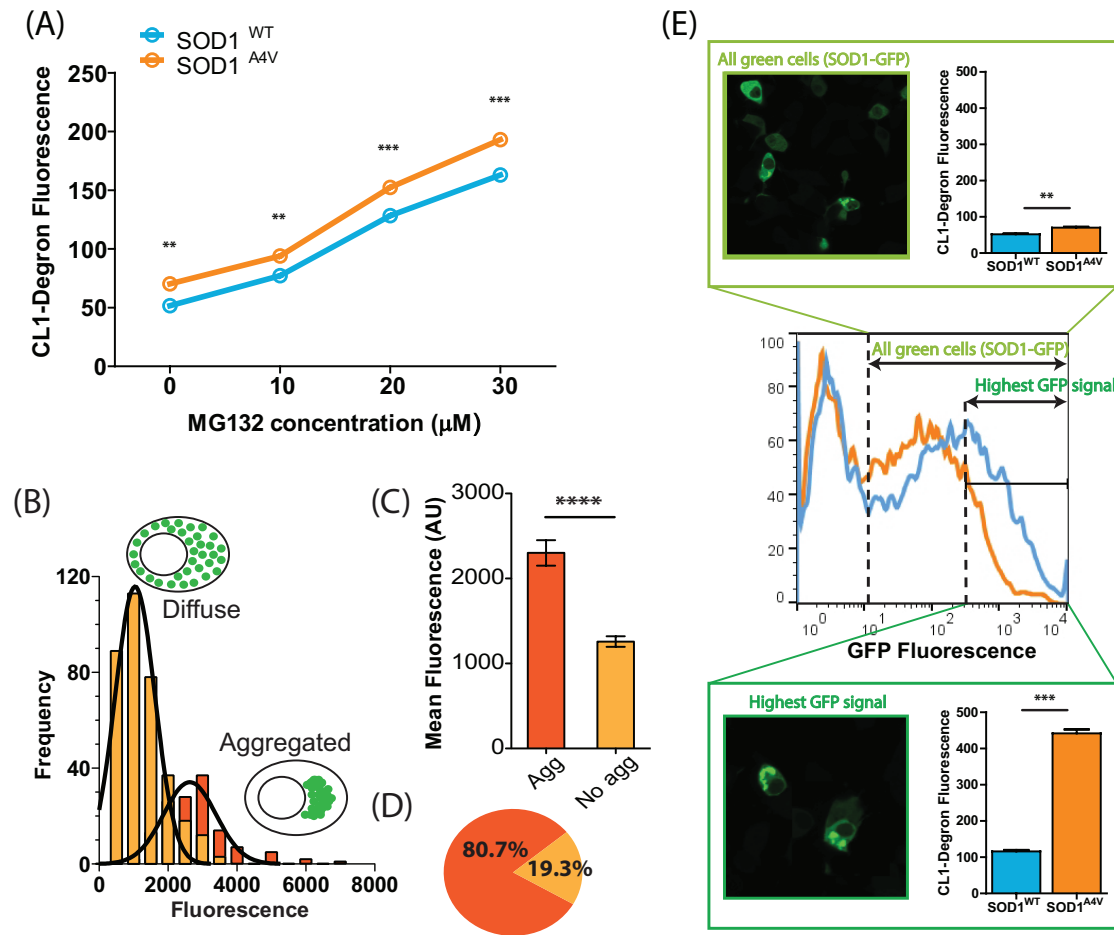

957  
958  
959  
960  
961  
962  
963  
964  
965  
966  
967  
968  
969  
970

**Figure 3: Mutant SOD1<sup>A4V</sup> alters UPS activity.** (A) Dose dependent response of UPS activity (tdTomato<sup>CL1</sup> fluorescence) in NSC-34 cells co-transfected with SOD1-GFP after overnight treatment with the proteasome inhibitor MG132. Data represent mean CL1-Degron fluorescence  $\pm$  SEM (n=3), \*\* P< 0.01; \*\*\* P<0.001. (B) Frequency distribution analysis of SOD1-GFP fluorescence was performed on cells expressing soluble (diffuse) SOD1<sup>A4V</sup> and aggregated SOD1<sup>A4V</sup>. (C) Cells containing SOD1<sup>A4V</sup> aggregates exhibited significantly higher fluorescence than cells that did not contain aggregates, \*\*\*\* P< 0.0001. (D) 80% of cells expressing the highest SOD1-GFP signal (top 10%) contained aggregates. (E) Cells expressing the highest GFP signal typically contained aggregates and revealed greater significant differences in tdTomato<sup>CL1</sup> fluorescence between cells expressing SOD1<sup>WT</sup> and SOD1<sup>A4V</sup>.

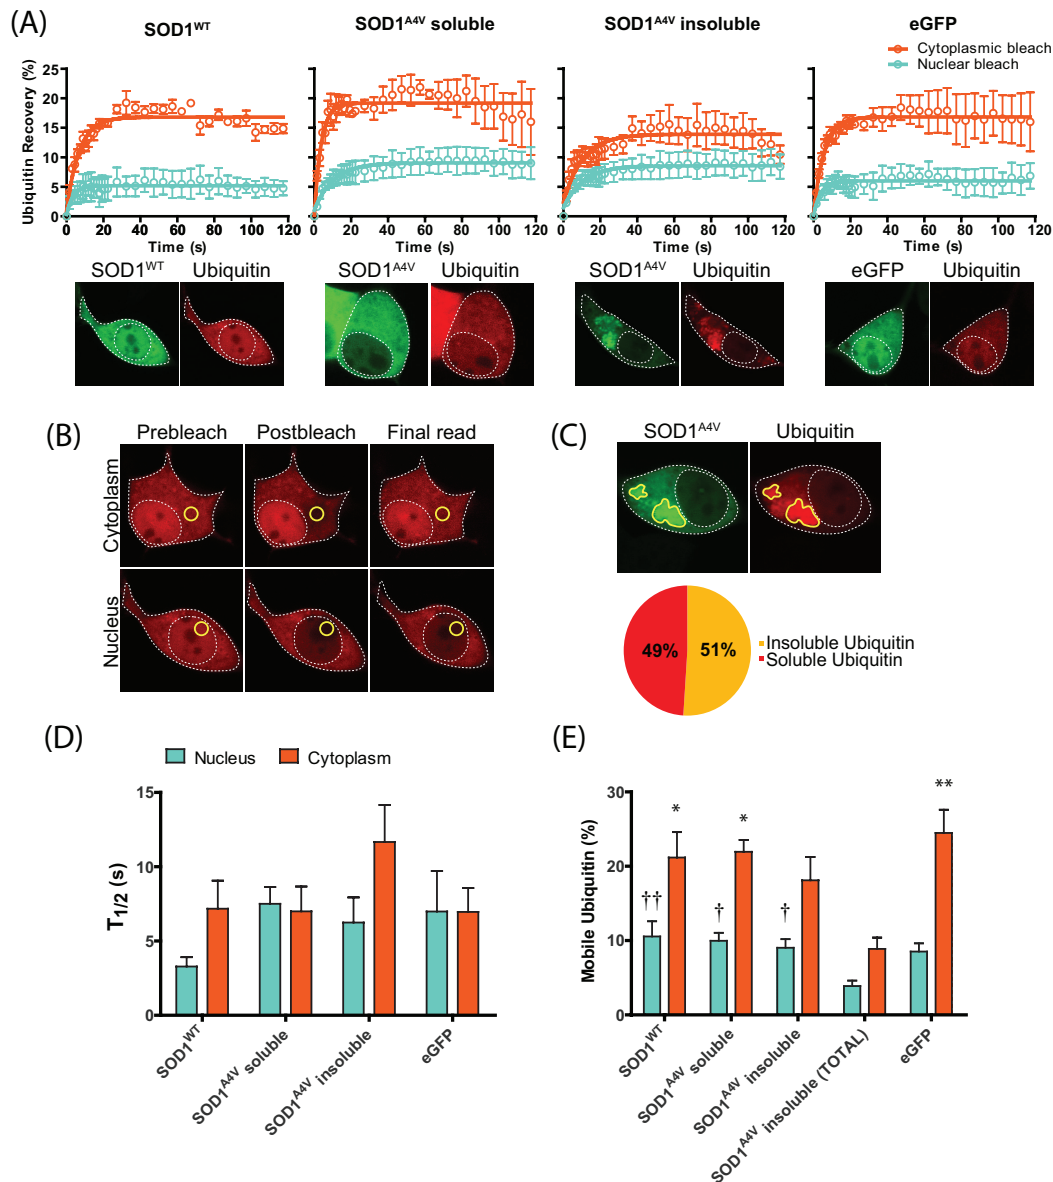

971  
 972 **Figure 4: Ubiquitin distribution is altered in cells containing SOD1<sup>A4V</sup>**  
 973 **aggregates.** (A) NSC-34 cells co-transfected with SOD1-GFP and mCherry-Ub were  
 974 photobleached in either the nucleus or cytoplasm and recovery of Ub fluorescence  
 975 was monitored for 120 s. Data shown are means  $\pm$  SEM (n=3) and are representative  
 976 of 3 independent experiments. (B) Representative confocal images of pre-bleach,  
 977 post-bleach and recovery endpoint are shown with the ROI marked in yellow. (C) The  
 978 amount of Ub incorporated into SOD1<sup>A4V</sup> inclusions was quantified using ImageJ. (D)  
 979 Diffusion rates of mCherry-Ub measured in both the nucleus and cytoplasm of co-  
 980 transfected NSC-34 cells. Error bars are SEM (n  $\geq$  6, combined from 3 independent  
 981 experiments). (E) Quantification of the proportion of mobile Ub in the nucleus and  
 982 cytoplasm of cells expressing either SOD1<sup>WT</sup>, soluble SOD1<sup>A4V</sup> or insoluble  
 983 SOD1<sup>A4V</sup>. SOD1<sup>A4V</sup> insoluble (TOTAL) represents total Ub levels taking into account  
 984 the proportion of Ub incorporated into SOD1 inclusions (determined in (C)). Data  
 985 shown are means  $\pm$  SEM combined from 3 independent experiments (n  $\geq$  7). One way  
 986 Anova was used to compare differences. \* and † indicate significant difference to  
 987 SOD1<sup>A4V</sup> insoluble (TOTAL) in the cytoplasm and nucleus respectively. \* † P < 0.05,  
 988 \*\* † † P < 0.01 .  
 989

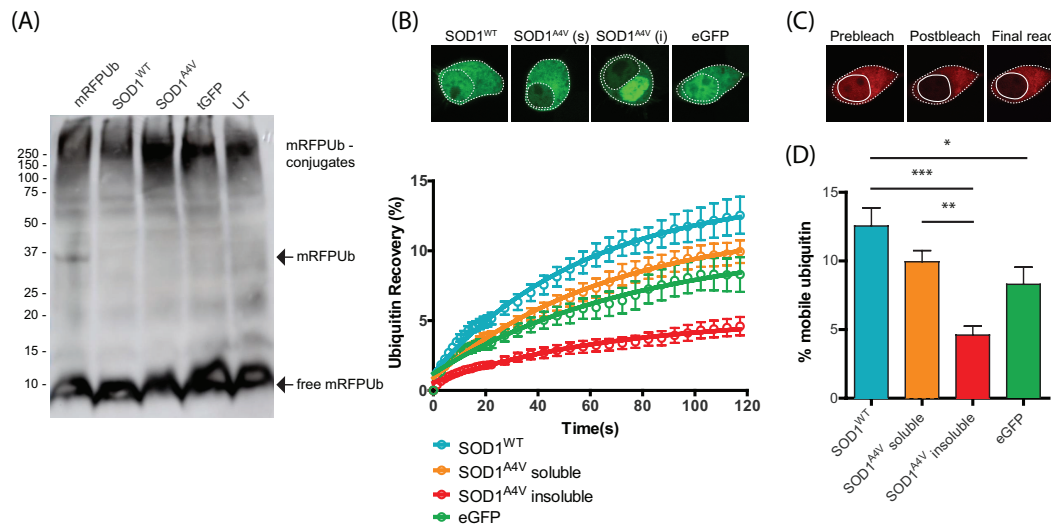

990  
 991 **Figure 5: Reduced levels of free monomeric ubiquitin in NSC-34 cells containing**  
 992 **SOD1<sup>A4V</sup> aggregates.** (A) Western blot analysis of cell lysates of NSC-34 cells  
 993 transiently transfected with SOD1-GFP, mRFP-Ub or eGFP control. Samples were  
 994 separated under reducing conditions and probed with anti-ubiquitin antibody. (B) The  
 995 entire nucleus of co-transfected NSC-34 cells was photobleached and the recovery of  
 996 nuclear Ub was monitored as a proportion of cytoplasmic fluorescence for 120 s. Data  
 997 shown are means  $\pm$  SEM ( $n \geq 17$ ) combined from 3 independent experiments. (C)  
 998 Representative confocal images of pre-bleach, post-bleach and final read. (D). The  
 999 percentage of mobile Ub in the nucleus at the final read was quantified as a proportion  
 1000 of cytoplasmic fluorescence. Data represent mean  $\pm$  SEM ( $n \geq 17$ , combined from 3  
 1001 independent experiments)\*  $P < 0.05$ , \*\*  $P < 0.01$ , \*\*\*  $P < 0.001$ .

1002  
 1003  
 1004  
 1005

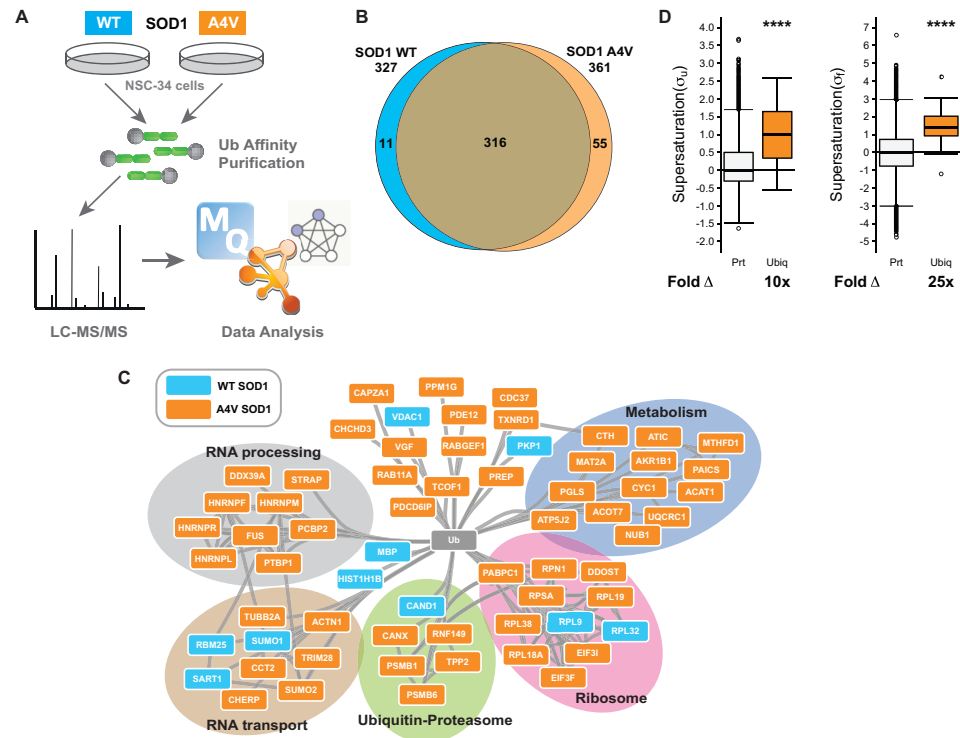

1006  
 1007  
 1008  
 1009  
 1010  
 1011  
 1012  
 1013  
 1014  
 1015  
 1016  
 1017  
 1018  
 1019  
 1020  
 1021

**Figure 6: The ubiquitylated proteome of transfected NSC-34 cells.** (A) NSC-34 cells expressing GFP fusions of SOD1<sup>WT</sup> or SOD1<sup>A4V</sup> were subjected to high affinity purification to isolate ubiquitylated proteins which were subsequently identified by LC-MS/MS. (B) Venn analysis comparing the number of ubiquitylated proteins in NSC-34 cells transfected with either SOD1<sup>A4V</sup> (n=2) or SOD1<sup>WT</sup> (n=3). (C) STRING analysis of protein-protein interaction network of ubiquitylated proteins unique to either SOD1<sup>A4V</sup> or SOD1<sup>WT</sup>. Proteins were identified as present in each condition if they were present in at least two replicates for that condition. Additionally proteins were only considered “unique” to either SOD1<sup>WT</sup> or SOD1<sup>A4V</sup> if they were not identified in any of the replicates for any of the other conditions. (D) The median supersaturation score calculated for the unfolded ( $\sigma_u$ ) and native ( $\sigma_f$ ) states of proteins unique to the SOD1<sup>A4V</sup> ubiquitome. Fold  $\Delta$  refers to the increase in supersaturation score from the known mouse proteome.

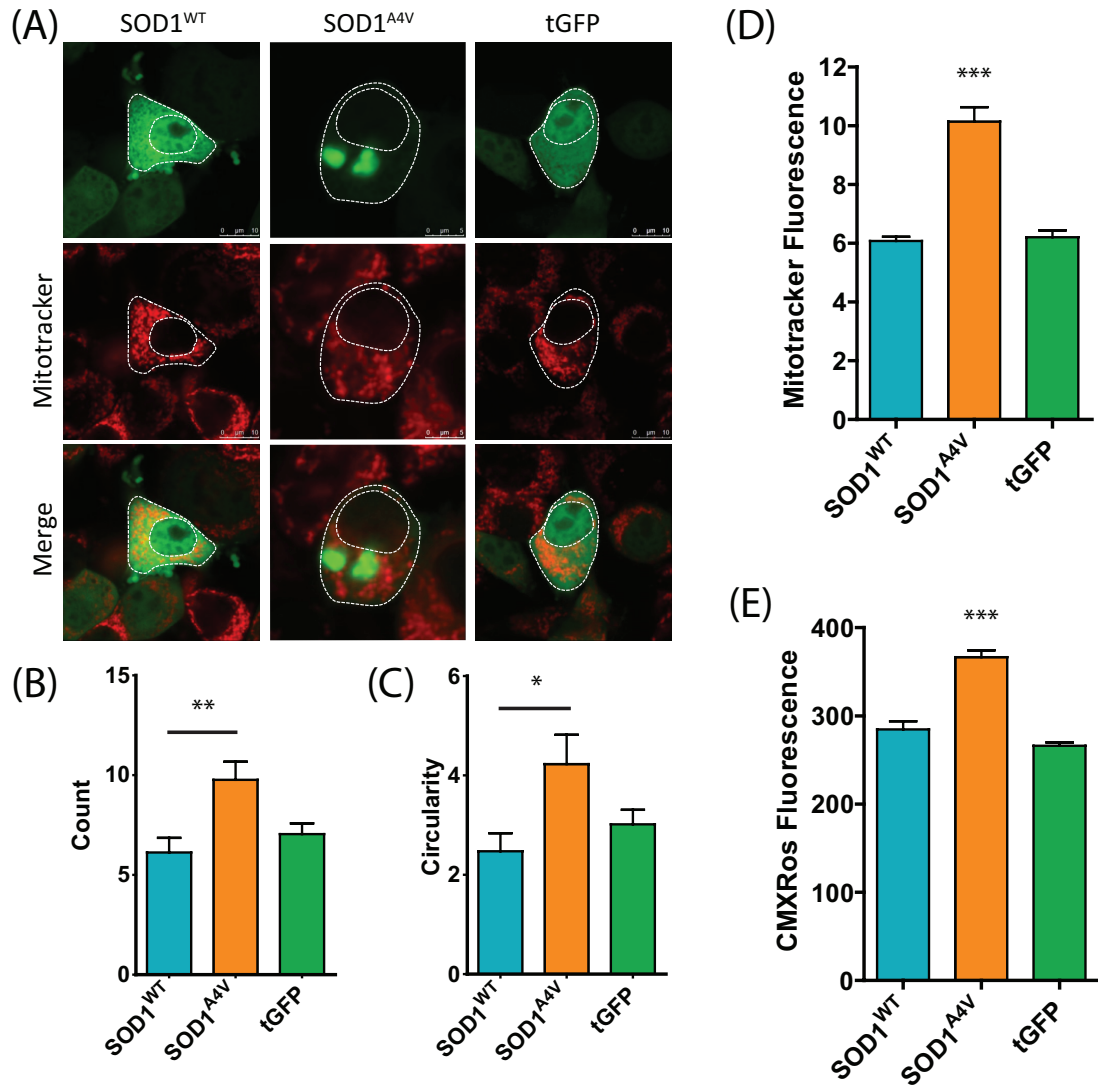

1022  
1023  
1024  
1025  
1026  
1027  
1028  
1029  
1030  
1031  
1032  
1033

**Figure 7: Cells containing SOD1 aggregates display altered mitochondrial morphology and dysfunction.** (A) NSC-34 cells transiently transfected with SOD1-GFP were stained for mitochondria 48 h post transfection with Mitotracker Deep Red. The number of mitochondria (B) and circularity (C) was determined using a mitochondrial morphology macro in ImageJ. Data represent mean  $\pm$  SEM ( $n \geq 23$ ) \*  $P < 0.05$ , \*\*  $P < 0.01$ . (D) Mitotracker fluorescence was also quantified by flow cytometry in cells expressing the highest levels of SOD1-GFP. (E) Mitochondrial membrane potential was examined through the accumulation of Mitotracker Red CMXRos. Data represent mean  $\pm$  SEM ( $n = 3$ ) \*\*\*  $P < 0.001$ .



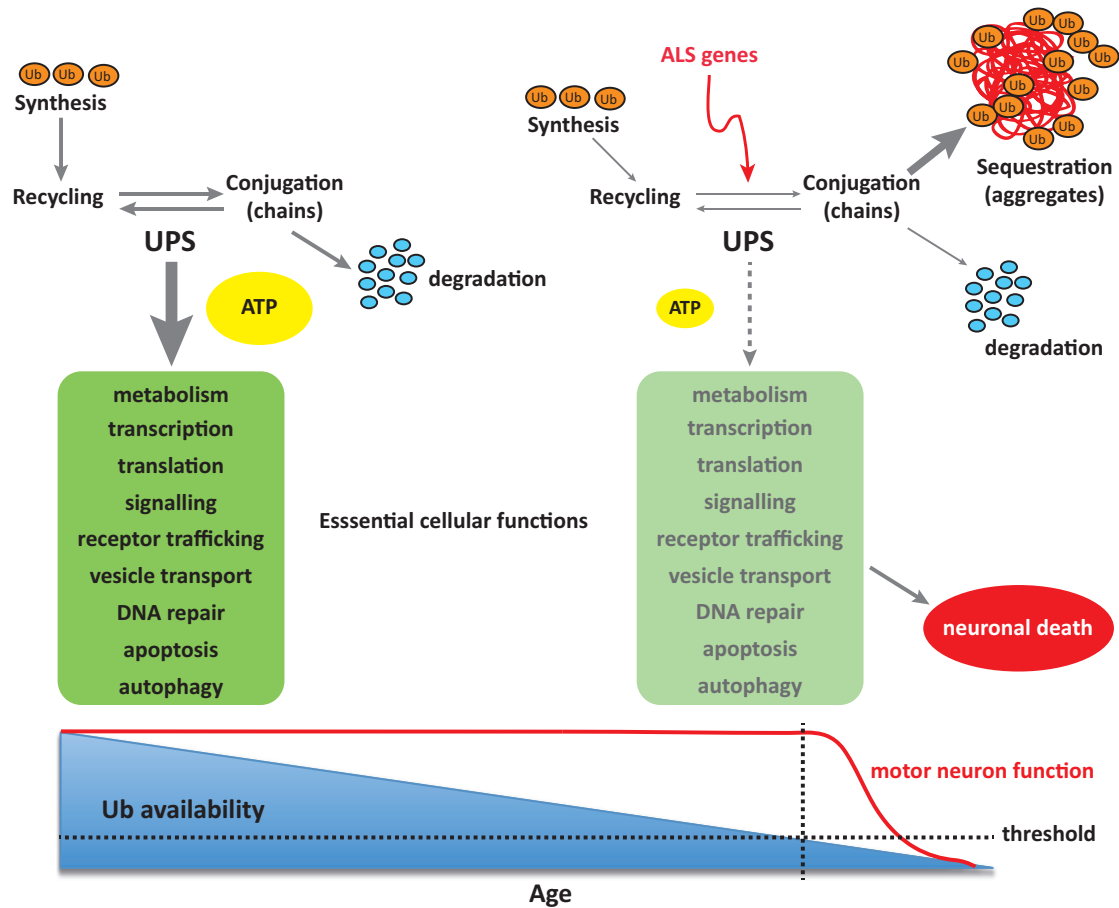

1034  
1035  
1036  
1037  
1038  
1039  
1040  
1041  
1042  
1043  
1044  
1045  
1046  
1047  
1048

**Figure 8: Disrupted Ub homeostasis in ALS.** Mutations in SOD1-associated ALS disrupt Ub homeostasis, either directly or through sequestration of Ub into protein aggregates. These changes result in altered Ub distribution and subsequent depletion of free Ub, eventually reaching a threshold below which vital cellular functions are severely compromised, and ultimately result in cell death.

**Table 1. Proteins identified unique to A4V or WT SOD1:**

| Entry  | Entry name  | Protein names                                                                 | Gene names                 | Unique peptides |
|--------|-------------|-------------------------------------------------------------------------------|----------------------------|-----------------|
| P14206 | RSSA_MOUSE  | 40S ribosomal protein SA                                                      | Rpsa Lamr1 P40-8           | 5               |
| P47753 | CAZA1_MOUSE | F-actin-capping protein subunit alpha-1                                       | Capza1 Cappa1              | 3               |
| Q91V12 | BACH_MOUSE  | Cytosolic acyl coenzyme A thioester hydrolase                                 | Acot7 Bach                 | 3               |
| Q9QUR6 | PPCE_MOUSE  | Prolyl endopeptidase                                                          | Prep Pep                   | 4               |
| Q922D8 | C1TC_MOUSE  | C-1-tetrahydrofolate synthase                                                 | Mthfd1                     | 2               |
| P45376 | ALDR_MOUSE  | Aldose reductase                                                              | Akr1b1 Akr1b3 Aldor1 Aldr1 | 4               |
| Q8CGZ0 | CHERP_MOUSE | Calcium homeostasis endoplasmic reticulum protein                             | Cherp Scaf6                | 3               |
| Q8R081 | HNRPL_MOUSE | Heterogeneous nuclear ribonucleoprotein L                                     | Hnrpl Hnrpl                | 2               |
| O08784 | TCOF_MOUSE  | Treacle protein                                                               | Tcof1                      | 2               |
| O09061 | PSB1_MOUSE  | Proteasome subunit beta type-1                                                | Psmb1                      | 2               |
| O54734 | OST48_MOUSE | Dolichyl-diphosphooligosaccharide--protein glycosyltransferase 48 kDa subunit | Ddost                      | 4               |
| P29341 | PABP1_MOUSE | Polyadenylate-binding protein 1                                               | Pabpc1 Pabp1               | 4               |
| P35564 | CALX_MOUSE  | Calnexin                                                                      | Canx                       | 5               |
| P62492 | RB11A_MOUSE | Ras-related protein Rab-11A                                                   | Rab11a Rab11               | 2               |
| P54729 | NUB1_MOUSE  | NEDD8 ultimate buster 1                                                       | Nub1 Nyren18               | 2               |
| P56135 | ATPK_MOUSE  | ATP synthase subunit f, mitochondrial                                         | Atp5j2                     | 2               |
| P56959 | FUS_MOUSE   | RNA-binding protein FUS                                                       | Fus                        | 3               |
| Q7TPR4 | ACTN1_MOUSE | Alpha-actinin-1                                                               | Actn1                      | 5               |
| P61957 | SUMO2_MOUSE | Small ubiquitin-related modifier 2                                            | Sumo2 Smt3b Smt3h2         | 2               |
| P62717 | RL18A_MOUSE | 60S ribosomal protein L18a                                                    | Rpl18a                     | 4               |

|        |             |                                                                                      |                            |   |
|--------|-------------|--------------------------------------------------------------------------------------|----------------------------|---|
| Q3THS6 | METK2_MOUSE | S-adenosylmethionine synthase isoform type-2 (AdoMet synthase 2)                     | Mat2a                      | 2 |
| Q3TIU4 | PDE12_MOUSE | 2',5'-phosphodiesterase 12 (2'-PDE) (2-PDE)                                          | Pde12                      | 2 |
| Q3U2C5 | RN149_MOUSE | E3 ubiquitin-protein ligase RNF149                                                   | Rnf149 Greul4              | 2 |
| Q60692 | PSB6_MOUSE  | Proteasome subunit beta type-6                                                       | Psmb6 Lmp19                | 3 |
| Q61074 | PPM1G_MOUSE | Protein phosphatase 1G                                                               | Ppm1g Fin13 Ppm1c          | 3 |
| Q61081 | CDC37_MOUSE | Hsp90 co-chaperone Cdc37                                                             | Cdc37                      | 2 |
| Q61990 | PCBP2_MOUSE | Poly(rC)-binding protein 2 (Alpha-CP2)                                               | Pcbp2 Cbp HnrnpX Hnrpx     | 2 |
| Q62318 | TIF1B_MOUSE | Transcription intermediary factor 1-beta (TIF1-beta) (E3 SUMO-protein ligase TRIM28) | Trim28 Kap1 Krip1 Tif1b    | 4 |
| Q64514 | TPP2_MOUSE  | Tripeptidyl-peptidase 2 (TPP-2)                                                      | Tpp2                       | 2 |
| Q8QZT1 | THIL_MOUSE  | Acetyl-CoA acetyltransferase, mitochondrial                                          | Acat1                      | 2 |
| Q8VCN5 | CGL_MOUSE   | Cystathionine gamma-lyase                                                            | Cth                        | 3 |
| Q8VDW0 | DX39A_MOUSE | ATP-dependent RNA helicase DDX39A                                                    | Ddx39a Ddx39               | 2 |
| Q7TMK9 | HNRPQ_MOUSE | Heterogeneous nuclear ribonucleoprotein Q (hnRNP Q)                                  | Syncrip Hnrpq Nsap1 Nsap11 | 3 |
| Q91YQ5 | RPN1_MOUSE  | Dolichyl-diphosphooligosaccharide--protein glycosyltransferase subunit 1             | Rpn1                       | 5 |
| P17225 | PTBP1_MOUSE | Polypyrimidine tract-binding protein 1 (PTB)                                         | Ptbp1 Ptb                  | 4 |
| Q99LX5 | MMTA2_MOUSE | Multiple myeloma tumor-associated protein 2 homolog                                  | Mmtag2                     | 2 |
| Q9CQ60 | 6PGL_MOUSE  | 6-phosphogluconolactonase (6PGL)                                                     | Pgl                        | 5 |
| Q9CRB9 | MIC19_MOUSE | MICOS complex subunit Mic19                                                          | Chchd3 Mic19               | 3 |
| Q9CWF2 | TBB2B_MOUSE | Tubulin beta-2B chain                                                                | Tubb2b                     | 3 |
| Q9CWJ9 | PUR9_MOUSE  | Bifunctional purine biosynthesis protein PURH                                        | Atic Purh                  | 4 |
| Q9CZ13 | QCR1_MOUSE  | Cytochrome b-c1 complex subunit 1, mitochondrial (Complex III subunit 1)             | Uqcr1                      | 4 |
| Q9D0E1 | HNRPM_MOUSE | Heterogeneous nuclear ribonucleoprotein M                                            | Hnrpm Hnrpm                | 3 |
| Q9D0M3 | CY1_MOUSE   | Cytochrome c1, heme protein, mitochondrial (Complex III subunit 4)                   | Cyc1                       | 3 |
| Q9DCH4 | EIF3F_MOUSE | Eukaryotic translation initiation factor 3 subunit F                                 | Eif3f Eif3s5               | 4 |
| Q9DCL9 | PUR6_MOUSE  | Multifunctional protein ADE2                                                         | Paics                      | 5 |
| Q9JJI8 | RL38_MOUSE  | 60S ribosomal protein L38                                                            | Rpl38                      | 3 |
| Q9JM13 | RABX5_MOUSE | Rab5 GDP/GTP exchange factor                                                         | Rabgef1 Rabex5             | 3 |

|                                   |             |                                                              |                              |    |
|-----------------------------------|-------------|--------------------------------------------------------------|------------------------------|----|
| Q9JMH6                            | TRXR1_MOUSE | Thioredoxin reductase 1, cytoplasmic                         | Txnrd1 Trxr1                 | 2  |
| Q9QZD9                            | EIF3I_MOUSE | Eukaryotic translation initiation factor 3 subunit I         | Eif3i Eif3s2 Trip1           | 4  |
| Q9WU78                            | PDC6I_MOUSE | Programmed cell death 6-interacting protein                  | Pdcd6ip Aip1 Alix            | 4  |
| Q9Z1Z2                            | STRAP_MOUSE | Serine-threonine kinase receptor-associated protein          | Strap Unrip                  | 2  |
| Q9Z2X1                            | HNRPF_MOUSE | Heterogeneous nuclear ribonucleoprotein F                    | Hnrnpf Hnrpf                 | 3  |
| <b>Unique to SOD<sup>WT</sup></b> |             |                                                              |                              |    |
| B2RY56                            | RBM25_MOUSE | RNA-binding protein 25                                       | Rbm25                        | 2  |
| P51410                            | RL9_MOUSE   | 60S ribosomal protein L9                                     | Rpl9                         | 5  |
| P04370                            | MBP_MOUSE   | Myelin basic protein                                         | Mbp Shi                      | 4  |
| P43276                            | H15_MOUSE   | Histone H1.5                                                 | Hist1h1b H1f5                | 3  |
| P62911                            | RL32_MOUSE  | 60S ribosomal protein L32                                    | Rpl32                        | 3  |
| P63166                            | SUMO1_MOUSE | Small ubiquitin-related modifier 1 (SUMO-1)                  | Sumo1 Smt3c Smt3h3 Ubl1      | 2  |
| P97350                            | PKP1_MOUSE  | Plakophilin-1                                                | Pkp1                         | 17 |
| Q60932                            | VDAC1_MOUSE | Voltage-dependent anion-selective channel protein 1 (VDAC-1) | Vdac1 Vdac5                  | 8  |
| Q6ZQ38                            | CAND1_MOUSE | Cullin-associated NEDD8-dissociated protein 1                | Cand1 D10Ert516e<br>Kiaa0829 | 2  |
| Q7TSF1                            | DSG1B_MOUSE | Desmoglein-1-beta                                            | Dsg1b Dsg5                   | 6  |
| Q9Z315                            | SNUT1_MOUSE | U4/U6.U5 tri-snRNP-associated protein 1                      | Sart1 Haf                    | 2  |

## **SOD1<sup>A4V</sup> aggregation alters ubiquitin homeostasis in a cell model of ALS**

**Natalie E. Farrowell<sup>1,2</sup>, Isabella Lambert-Smith<sup>1,2</sup>, Kristen Mitchell<sup>1,2</sup>, Jessie McKenna<sup>3</sup>, Luke McAlary<sup>1,2,4</sup>, Prajwal Ciryam<sup>5,6,7</sup>, Kara L. Vine<sup>1,2</sup>, Darren N. Saunders<sup>3</sup>, Justin J. Yerbury<sup>1,2\*</sup>**

<sup>1</sup>Illawarra Health and Medical Research Institute, Wollongong, NSW, Australia

<sup>2</sup>School of Biological Sciences, Centre of Medicine and Molecular Bioscience, University of Wollongong, Northfields Ave, Wollongong, NSW, Australia, 2522

<sup>3</sup>School of Medical Sciences, Faculty of Medicine, UNSW Australia

<sup>4</sup>Department of Physics & Astronomy, University of British Columbia, Vancouver, British Columbia, Canada.

<sup>5</sup>Department of Chemistry, University of Cambridge, Cambridge CB2 1EW, UK

<sup>6</sup>Department of Molecular Biosciences, Rice Institute for Biomedical Research, Northwestern University, Evanston, IL 60208-3500, USA

<sup>7</sup>Department of Neurology, Columbia University College of Physicians & Surgeons, New York, NY 10032-3784

### **Supplementary Methods**

To quantify SOD1 inclusion formation, images were acquired as described previously [1]. Briefly, z-stack images of NSC-34 cells transfected with SOD1-GFP constructs were acquired 48 h post transfection using the 63X objective, 512 x 512 pixels, 1 line and frame average and a scan speed of 400 Hz. Z-stacks were processed into a single image using LAS-AF Lite software (Leica) and at least 100 transfected cells were analysed for the presence of inclusions.

**Toxicity Assay.** The toxicity of cells expressing SOD1 was monitored over 68 h in an Incucyte automated fluorescent microscope (Essen BioScience, USA) as described in [1]. Cells were dissociated 24 h post transfection and replated in 96-well plates at a confluency of 20% in phenol red free DMEM/F12 containing 10% FBS. Images were acquired every 2 h and analysed using a processing definition trained to select GFP positive cells. The number of GFP positive cells was normalised to time zero before SOD1<sup>A4V</sup> numbers were adjusted to SOD1<sup>WT</sup> values.

## Supplementary Figures

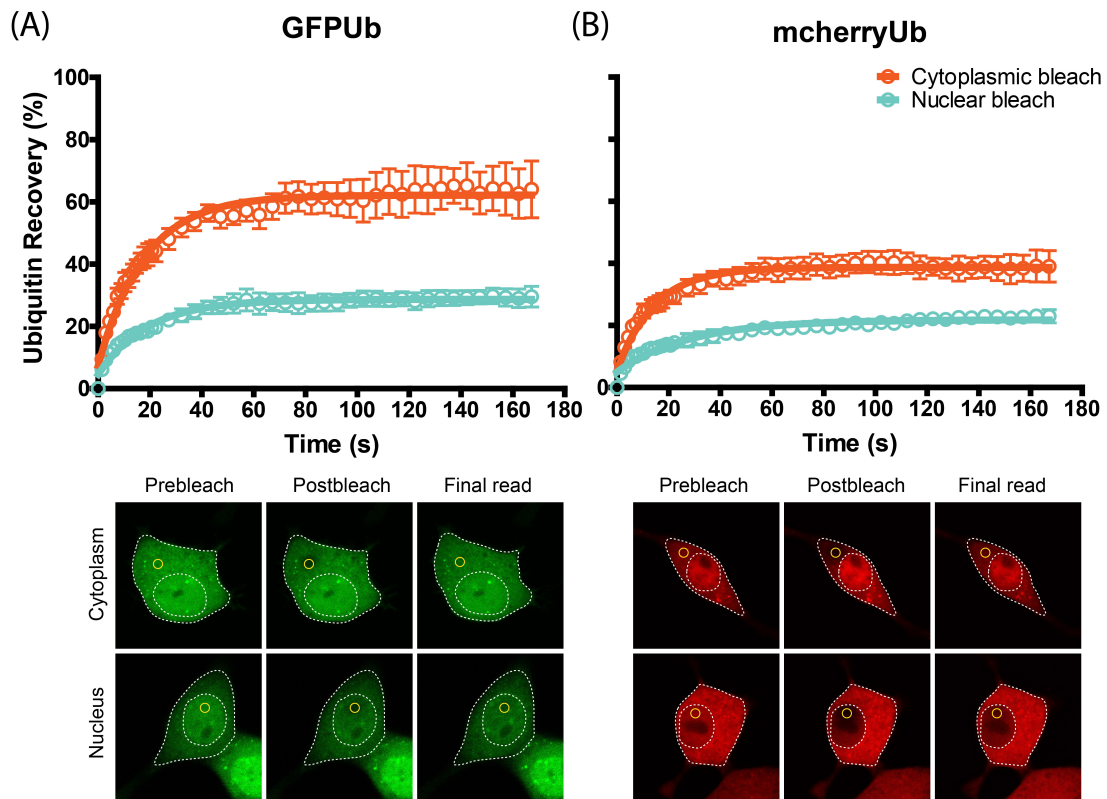

**Figure S1: mcherry-Ub behaves in a similar manner to GFP-Ub.** (A) NSC-34 cells transfected with either GFP-Ub (A) or mcherry-Ub (B) were photobleached in the cytoplasm or nucleus and recovery of Ub fluorescence was monitored for up to 170 s. Representative confocal images of prebleach, postbleach and recovery endpoint are shown with the ROI marked in yellow.

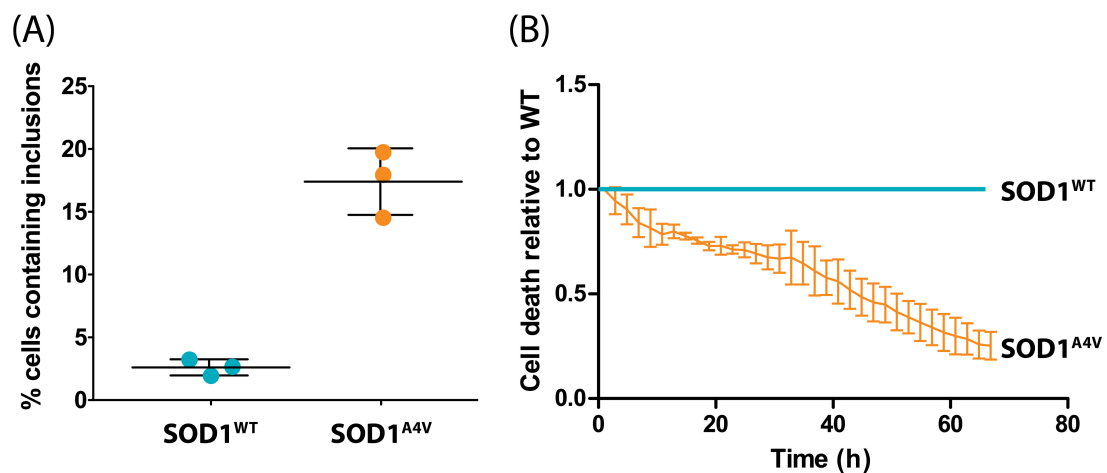

**Figure S2: SOD1<sup>A4V</sup> expression induces inclusion formation and is associated with increased cell death in NSC-34 cells.** (A) Inclusion formation in NSC-34 cells expressing SOD1-GFP was determined 48 h post transfection. (B) The toxicity of SOD1<sup>A4V</sup> was monitored in comparison to SOD1<sup>WT</sup> over a 68 h period.

[1] L. McAlary, J.A. Aquilina, J.J. Yerbury, Susceptibility of Mutant SOD1 to Form a Destabilized Monomer Predicts Cellular Aggregation and Toxicity but Not In vitro Aggregation Propensity, *Front Neurosci* 10 (2016) 499.
